1 **Short Running title: Natural variation of canola photoperiod**

2

3 **GWAS hints at pleiotropic roles for *FLOWERING LOCUS T* in flowering time and**  
4 **yield-related traits in canola**

5

6 Harsh Raman<sup>1\*</sup>, Rosy Raman<sup>1</sup>, Yu Qiu<sup>1</sup>, Avilash Singh Yadav<sup>2</sup>, Sridevi Sureshkumar<sup>2</sup>,  
7 Lauren Borg<sup>3</sup>, Rohan Maheswaran<sup>1</sup>, David Wheeler<sup>4</sup>, Ollie Owens<sup>1</sup>, Ian Menz<sup>1</sup> and  
8 Sureshkumar Balasubramanian<sup>2</sup>

9

10 <sup>1</sup>NSW Department of Primary Industries, Wagga Wagga Agricultural Institute, Wagga  
11 Wagga, NSW 2650, Australia. <sup>2</sup>School of Biological Sciences, Monash University, Clayton,  
12 VIC3800, Australia. <sup>3</sup>Centre for Bioinformatics and Biometrics, University of Wollongong  
13 NSW 2522, Australia. <sup>4</sup>NSW Department of Primary Industries, Orange Agricultural  
14 Institute, Orange, NSW 2800, Australia

15

16 **ORCID IDS:** <https://orcid.org/0000-0001-9761-1518> (HR)

17

18 [<sup>1</sup>harsh.raman@dpi.nsw.gov.au](mailto:harsh.raman@dpi.nsw.gov.au)

19 [<sup>1</sup>rosy.raman@dpi.nsw.gov.au](mailto:rosy.raman@dpi.nsw.gov.au)

20 [<sup>1</sup>yqiu@csu.edu.au](mailto:yqiu@csu.edu.au)

21 [<sup>1</sup>maheswaran.rohan@dpi.nsw.gov.au](mailto:maheswaran.rohan@dpi.nsw.gov.au)

22 [<sup>1</sup>ollie.owen@dpi.nsw.gov.au](mailto:ollie.owen@dpi.nsw.gov.au)

23 [<sup>1</sup>ian.menz@dpi.nsw.gov.au](mailto:ian.menz@dpi.nsw.gov.au)

24 [<sup>2</sup>avilash.singhyadav@monash.edu](mailto:avilash.singhyadav@monash.edu)

25 [<sup>2</sup>sridevi.sureshkumar@monash.edu](mailto:sridevi.sureshkumar@monash.edu)

26 [<sup>2</sup>sureshkumar.balasubramanian@monash.edu](mailto:sureshkumar.balasubramanian@monash.edu)

27 [<sup>3</sup>lborg@uow.edu.au](mailto:lborg@uow.edu.au)

28 [<sup>4</sup>dave.wheeler@dpi.nsw.gov.au](mailto:dave.wheeler@dpi.nsw.gov.au)

29 **Highlight:** The genetic association, eQTL and expression analyses suggest that *FT* paralogs  
30 have multifaceted roles in canola flowering time, plant development and productivity traits.

31

32 **The number of tables:** 1

33 **The number of figures:** 10

34 **The word count:** 11159

35 **Supplementary table:** 17

36 **Supplementary figures:** 6

37

38

39

40

41

42 **Corresponding author:**

43

44

45 Dr. Harsh Raman

46 NSW Department of Primary Industries

47 Wagga Wagga Agricultural Institute, Wagga Wagga, NSW 2650

48 Australia

49 Tel: +61 2 6938 19125, Fax: +61 2 6938 1809

50 Email: [harsh.raman@dpi.nsw.gov.au](mailto:harsh.raman@dpi.nsw.gov.au)

51 **Abstract**

52 Transition to flowering at the right time is critical for local adaptation and to maximize seed  
53 yield in canola, which is an important oilseed crop. There is extensive variation among canola  
54 varieties in flowering time. However, our understanding of underlying genes and their role in  
55 canola productivity is still limited. We reveal natural variation in flowering time and response  
56 to photoperiod in a diverse GWAS panel (up to 368 accessions) of canola and identify  
57 associated SNPs across multiple experiments. Complementary QTL and eQTL mapping  
58 studies were also conducted in an Australian doubled haploid (DH) population for flowering  
59 time and other grain yield related traits. We show that several associations that were  
60 repeatedly detected across experiments map in the vicinity of *FLOWERING LOCUS T (FT)*  
61 paralogues and its known transcriptional regulators. QTL mapping study in a DH population  
62 detected consistent genomic regions close to *FT* paralogs. *FT* sequences vary between  
63 accessions and *FT* expression in field and controlled environment grown plants was  
64 correlated with flowering time. *FT* paralogs displayed association not only with flowering  
65 time, but also with plant emergence, shoot biomass and grain yield. Our findings suggest that  
66 *FT* paralogs not only modulate flowering time but also modulate yield-related productivity  
67 traits in canola.

68

69

70

71

72

73

74

75

76

77

78 **Keywords:** natural variation; flowering time; canola; photoperiod, genome-wide association  
79 analysis, linkage analysis; gene expression; expression QTL analysis

80 **Introduction** Natural variation provides a valuable resource to discover genetic and  
81 molecular basis of phenotypic diversity in plant development, adaptation and productivity  
82 (Alonso-Blanco *et al.*, 2009; Pin and Nilsson, 2012). Canola (rapeseed, *Brassica napus* L.,

83  $A_nA_nC_nC_n$  genomes,  $2n = 4 \times (=38)$  is an important oil crop, varieties of which displays  
84 extensive variation in life history traits such as flowering time. Precise knowledge of  
85 flowering time is fundamental for both identifying varieties that are locally adapted and for  
86 the development of varieties that are suitable to changing environments, while maximizing  
87 grain yield, oil content and quality. Early flowering varieties are preferred for cultivation for  
88 shorter season especially under water-limited conditions to escape from excessive drought  
89 and heat, whereas winter/semi-winter crops are targeted for longer season under temperate  
90 regions to achieve maximum yield.

91

92 In *Arabidopsis thaliana*, four major pathways involved in flowering time; photoperiod,  
93 vernalisation, autonomous flowering and gibberellic acid response are reported (Koornneef *et al.*,  
94 2004; Weigel, 2012). In addition, flowering is also affected by other external factors such  
95 as ambient temperature, insect-pests, pathogens, light quality, and abiotic stress, and some of  
96 these integrate with the flowering pathways. Genetic analyses based on classical linkage  
97 mapping (quantitative trait loci: QTL) and genome-wide association studies (GWAS) have  
98 revealed that flowering time in canola is a multi-genic trait (Ferreira *et al.*, 1995; Long *et al.*,  
99 2007; Nelson *et al.*, 2014; Raman *et al.*, 2016b; Raman *et al.*, 2013; Raman *et al.*, 2016c;  
100 Schiessl *et al.*, 2015; Xu *et al.*, 2016; Yi *et al.*, 2018). Candidate genes underlying flowering  
101 time variation due to vernalisation have been identified in *B. napus* (Fletcher *et al.*, 2015;  
102 Hou *et al.*, 2012; Raman *et al.*, 2016b; Raman *et al.*, 2013; Tadege *et al.*, 2001; Wang *et al.*,  
103 2011; Zou *et al.*, 2012). We have previously shown that *BnFLC.A02* accounts for the  
104 majority (~23%) of variation in flowering time among diverse accessions of canola (Raman  
105 *et al.*, 2016b). Nevertheless, little is known about functional role of the photoperiod  
106 responsive genes in modulating flowering time especially in spring canola varieties.

107

108 *FLOWERING LOCUS T (FT)* is a floral integrator and as such generally considered  
109 downstream of the photoperiod pathway, integrating inputs from different pathways. In *A.*  
110 *thaliana*, loss-of-function mutations in *FT* gene result in late flowering under long-day  
111 conditions (Koornneef *et al.*, 1998; Koornneef *et al.*, 1991). In *B. napus*, six paralogues of *FT*  
112 have been identified (Wang *et al.*, 2012; Wang *et al.*, 2009) which contribute to functional  
113 divergence affecting flowering time between winter and spring cultivars. Mutation in  
114 *BnC6.FTa* and *BnC6.FTb* paralogs have been shown to alter flowering time in *B. napus*  
115 accessions (Guo *et al.*, 2014). Owing to the multiple copies of *FT* in canola, it has been  
116 difficult to establish the functionality and precise relationship between various paralogs in

117 plant development and productivity traits, as shown in Arabidopsis, onion and potato  
118 (Kinoshita *et al.*; Krieger *et al.*, 2010; Lee *et al.*, 2013; Lifschitz *et al.*, 2006; Navarro *et al.*,  
119 2011; Shalit *et al.*, 2009). In addition, under field conditions, it is difficult to determine the  
120 extent of genetic variation in photoperiod response, as plants undergo series of cold  
121 temperature-episodes required for vernalisation.

122

123 Here we determine the extent of flowering time variation utilizing a panel of diverse 368  
124 genotypes of canola representing different geographic locations of the world. By GWAS, we  
125 identify several underlying QTLs controlling phenotypic variation in flowering time and  
126 photoperiod response, estimated as difference in days to flower between long- and short day  
127 conditions. We show that the response to photoperiod maps to *FT* paralogues, and their  
128 potential transcriptional regulators such as *CIB*, *CO*, *CRY2*, *FVE*, *MSI*, *EMF2* and *PIF4*. We  
129 complement our findings through QTL analysis in a doubled haploid population. Using plants  
130 grown under LD and field conditions, we show that expression levels of *FT* paralogs are  
131 significantly associated with flowering time variation across diverse canola accessions. The  
132 eQTL analysis for *FT* expression levels map not only to *FT* itself (e.g., *BnA7.FT*) but also  
133 other loci that are known regulators of *FT* such as *BnFLC.C3b (FLC5)*, *FPA*, *SPAI* and  
134 *ELF4*. We also demonstrate that plant productivity traits such as plant emergence, shoot  
135 biomass accumulation, plant height, and grain yield map in the vicinity of *FT*. Taken together  
136 our findings suggest that *FT* has multifaceted role in plants and could be exploited for  
137 selection of canola varieties for improved productivity.

138

## 139 **MATERIALS AND METHODS**

140 Plant material and growth conditions

141 Evaluation of GWAS panel

142 A diverse panel of 368 accessions of *B. napus* L. was used to evaluate photoperiod response  
143 in this study (Supplemental Table S1). A subset of these, 300 accessions were evaluated for  
144 flowering time and grain yield (a) in field plots (35°03'36.9"S 147°18'40.2"E, 147 m above  
145 sea level) and (b) in single rows (35°02'27.0"S 147°19'12.6"E) at the Wagga Wagga  
146 Agricultural Institute (WWAI) research farm located at Wagga Wagga, NSW, Australia (c) at  
147 Condobolin, NSW, Australia (33. 0418.98°S, 147.1350.16°E, 220 m above sea level) in  
148 2017 canola growing season. For Wagga field trial, 300 accessions were arranged in a

149 randomized complete block design with 60 rows by 10 columns (ranges) in four flood  
150 irrigation bays, each bay had 15 rows and 10 ranges (Supplementary Table S2). A buffer row  
151 of an Australian canola variety, Sturt TT was seeded after every two ranges to ensure that  
152 plots are harvested at the 'right maturity time' with a mechanical plot harvester. For Wagga  
153 single row trial, 300 accessions were arranged in a randomized block design with 60 rows  
154 (each row 10 M long) by 10 columns in two replicates (Supplementary Table S2), each  
155 replicate of 30 rows was separated with a buffer row of SturtTT canola variety. The  
156 Condobolin trial was arranged in a random complete block design with 100 rows by 6  
157 columns, accommodating all 300 accessions in two replicates (Supplementary Table S2). .  
158 For field plot experiments, accessions were sown in plots (2 m wide × 10 m long at Wagga  
159 Wagga and 2 m wide × 12 m long at Condobolin) at density of 1400 seeds/20 m<sup>2</sup> plot. Seeds  
160 were counted with Kimseed machine and directly sown in plots in the field; each plot  
161 consisted of 6 rows spaced 25 cm apart. Plots were sown with a six-row cone-seeder to 10m  
162 length. All plots were sown with a granular fertilizer (N : P :K: S, 22 : 1 : 0 : 15) applied at  
163 150 kg ha<sup>-P</sup>. The fertilizer was treated with the fungicide Jubilee (a.i. flutriafol at 250 g Lat  
164 2Farmoz Pty Ltd (Adama), St Leonards, NSW) to protect all genotypes against the blackleg  
165 fungus, *Leptosphaeria maculans*. After crop establishment, plots were trimmed back to 8 m  
166 after emergence by applying Roundup (a. i. glyphosate) herbicide with a shielded spray  
167 boom.

168 For controlled environmental cabinets (CE), eight plants were grown in plastic trays  
169 as described previously (Raman *et al.*, 2016b) under long (LD) and short day (SD)  
170 conditions. For LD treatment, seeds were planted in a CE maintained at 20 ± 1°C under white  
171 fluorescent lamps (4000 K, Osram) with light intensity of approximately 150µM/m<sup>2</sup>/s, with a  
172 16-h photoperiod. In SD treatment, plants from 368 accessions were grown at the same  
173 conditions described above but for 8 h photoperiod.

174

175 Flowering time and other phenotypic measurements

176 Days to flower were recorded when 50% of plants have opened their first flower from the day  
177 of sowing. In SD conditions, flowering time was recorded for up to 200 days. Plants without  
178 any flower at the end of the experiments were assigned as value to 200 days; those  
179 phenotypes were classified as flower at (LD-A, SD-A, see Fig. 1). The response to

180 photoperiod was calculated as the difference between 50% flowering in plants grown under  
181 SD and LD conditions. For field trials, flowering time was recorded three times in a week.

182 Normalised Difference Vegetative Index (NDVI) was measured as a proxy of  
183 fractional ground cover for early vigour (Cabrera-Bosquet *et al.*, 2011; Cowley *et al.*, 2014)  
184 using a GreenSeeker® hand-held optical sensor unit (model 505, NTech Industries Inc.,  
185 Ukiah, CA, USA). The NDVI readings were taken at 7-10 days interval after 5 weeks of  
186 sowing before the onset of flowering. Multiple readings were taken in each plot and then  
187 averaged across each plot for genetic analysis. Plots were harvested by direct heading with a  
188 Kingroy plot harvester (Kingroy Engineering Works, Queensland, Australia) in the 4th wk  
189 of November (Condobolin, NSW) and 2-3 wk of December (Wagga, Australia). Grain  
190 samples were cleaned with Kimseed (Kimseed Australia, Western Australia) and plot yield  
191 was expressed into t/ha.

192

193 Field evaluation of SAgS DH population

194 A population of 144 DH lines derived from a BC<sub>1</sub>F<sub>1</sub> plant between Skipton/Ag-  
195 Spectrum//Skipton; SAgS DH population (Raman *et al* 2016) was grown in 2015  
196 (35°01'32.3"S 147°19'25.4"E) and 2016 (35°01'42.8"S, 147°20'23.3"E) in the field at the  
197 WWAI, NSW, Australia. Both trials were randomized in a complete block design with three  
198 replicates in a single block. A total of 1,400 seeds per genotype were directly sown in plots in  
199 the field as described above. The number of traits were measured, including plant emergence,  
200 first flowering, plant biomass, plant height, and grain yield. Plant (shoot) biomass was  
201 measured by cutting 10 random plants from the one meter central row of each plot and then  
202 brought back to the canola shed. Each sample was weighed on a digital scale and fresh  
203 weights were expressed in g/plant. Plant height (cm) was measured at the physiological  
204 maturity stage by measuring 5 plants selected randomly in the middle row of each plot. Plots  
205 were harvested with a Kingroy plot harvester in the 2-3 wk of December (Wagga,  
206 Australia).

207 .

208

209 Genome-wide genotyping

210 Leaf material was collected from 368 diverse DH canola accessions, grown under LD  
211 conditions, and then immediately snap-frozen in liquid nitrogen. Genomic DNA was isolated  
212 following method described previously (Raman et al 2016) and sent to Trait Genetics,  
213 Germany ([www.traitgenetics.com/](http://www.traitgenetics.com/)) for genotyping with Illumina Infinium 15k *Brassica* chip  
214 representing 60K Infinium SNP array (Clarke *et al.*, 2016). Markers which have the overall  
215 call rate over 90% were used for trait-marker association analysis. To prevent the potential  
216 loss of GWA, missing data was imputed (Rutkoski *et al.*, 2013).

217

218 Population structure and GWA analyses

219 The SNP markers with allele frequency <0.05 and call rate <90% (Atwell *et al.*, 2010) from  
220 the 13,714 genome-wide SNPs, were discarded before GWA analysis. Of them, 11,804 SNP  
221 markers could be anchored to the A<sub>n</sub> and C<sub>n</sub> subgenomes of reference sequenced genome of  
222 *B. napus* cv. 'Darmor-bzh', hereafter Darmor and used for cluster, and GWA analyses in a  
223 diversity panel of 368 accessions (S1 Table). Cluster analysis was performed with Neighbor-  
224 Joining method (Saitou and Nei, 1987) in MEGA version 6. In order to reduce spurious  
225 associations between markers and variation in flowering time, population structure and the  
226 relative kinship coefficients of individual genotypes were estimated as described previously  
227 (Raman *et al.*, 2016b). Flowering time-SNP marker association analysis was performed using  
228 the EMMAx/P3D method (Kang, 2008; Zhang *et al.*, 2010) implemented in GAPIT (Lipka *et*  
229 *al.*, 2012) in R package (<http://cran.r-project.org>). Significance of GWA between markers  
230 and flowering time was tested at LOD score of 3. The  $P$  ( $-\log_{10}P$ ) values for each SNP were  
231 exported to generate a Manhattan plot in R (Team, 2014). The proximity of candidate genes  
232 to identified associations based on the physical positions of SNPs/candidate genes was  
233 inferred based on functional annotation of the *A. thaliana* genome and implemented in the  
234 reference sequenced genome of 'Darmor' (Chalhoub *et al.*, 2014). Using Bonferroni  
235 correction, associations with LOD score = 5.41) were also considered as significant on a  
236  $p < 0.05$  level. The associations detected through GWAS, were compared against the QTL  
237 marker intervals associated with flowering time under field conditions in a SAgS DH  
238 mapping population evaluated in 2013 and 2014 (Raman *et al.*, 2016c) and in 2015 and 2016  
239 (this study).

240

241 Statistical and QTL analysis



242 Flowering and other phenotypic data collected from different experiments were analysed  
243 using linear mixed models in R as described previously (Raman *et al.*, 2018). Essentially we  
244 defined the individual experimental Plot as factor, with 432 levels for each of the 2015 and  
245 2016 trials. The factors Row and Range corresponded to the rows and ranges of the trials,  
246 with levels equal to the number of rows and ranges in each trial. The combination of levels of  
247 Row and Range completely index the levels of Plot such that Plot = Row:Range. The factor  
248 Rep has 3 levels corresponding to the replicate blocks in each trial. The plot structure for the  
249 field experiment consists of plots nested within blocks and is given by, Rep/Plot which can be  
250 expanded to give, Rep + Rep:Plot The term Rep:Plot indexes the observational units for all  
251 traits and so is equivalent to the residual term for these traits. The treatments for the field  
252 phase of the experiment are the lines allocated to plots and so we define the treatment factor,  
253 Genotype, with 144 levels corresponding to lines grown in each trial. Due to marker data  
254 being included in the model, we need to define an additional two factors; Gkeep  
255 (corresponding to lines with both phenotypic and marker data) and Gdrop. factor Gdrop has  
256 16 levels corresponding to lines with phenotypic data but not marker data. Therefore  
257 treatment structure is given by, Gkeep + Gdrop. Finally, marker data is incorporated into the  
258 analysis and individual markers are scanned following the approach of Nelson *et al.* (2014) to  
259 establish a final multi-QTL model. . We also used phenotypic data from 2013 and 2014  
260 experiments that was published previously (Raman *et al.*, 2016c), in order to test multifaceted  
261 role of *FT* in flowering time and other productivity traits across environments. Genetic map  
262 based of 7,716 DArTseq markers representing 499 unique loci (Raman *et al.*, 2016c) was  
263 used to determine trait-marker associations. The predicted means for first flowering, and  
264 response to photoperiod for each genotype were used to detect genome wide trait-marker  
265 associations.

266

267 *FT* expression and eQTL analyses

268 For the of *FT* expression analysis from extreme phenotypes, 24 accessions were selected  
269 from 368 GWAS accessions based of their flowering time and photoperiodic response. These  
270 accessions were raised in LD conditions under CE cabinets as described above using an  
271 experimental design with four replications and scored for flowering time (Supplemental  
272 Table S2). Five independent leaf samples from field/CE grown plants (at floral budding  
273 stage) per genotype; 24 GWAS and 144 DH lines of SAgS DH mapping population, were  
274 pooled and flash-frozen in liquid nitrogen (in field/CE).RNA was isolated using TRIZol  
275 (Invitrogen) and cDNA was synthesized using First Strand Synthesis Kit (Roche). Samples  
276 were controlled for their quality using two different approaches as outlined previously  
277 (Raman *et al.*, 2016b). The gene specific primers for each of six *FT* paralogs (Guo *et al.*,  
278 2014) were used for the expression analysis (Supplemental Table S3). Since all *FT* paralogs  
279 showed a high correlation among themselves, we used *BnC6.FT* gene expression data for  
280 eQTL analysis using SVS package (Golden Helix, Bozeman, USA).

281

282 Structural variation in canola *FT* paralogs

283 We generated the whole-genome resequence data for the 21 canola accessions (Raman et al,  
284 unpublished) representing our GWAS panel including both parental lines; Sipton and Ag-  
285 Spectrum, of the SAgS mapping population used in this study (Supplementary Table 2). Data  
286 was generated using the Illumina HiSeq 2000 sequencing platform using paired-end reads  
287 (150 bp). Reads were mapped on to reference genome assembly (version 4.1) of cv. ‘Darmor’  
288 using BWA (version 0.7.8). SNP and indel calling based on the short read alignment data was  
289 performed using the GATK haplotype caller (version 3.5). Variation across the *FT* paralogs  
290 was extracted using the gene model information or by manually identifying gene regions  
291 based on BLAT homology (Supplemental Table S4). The physical positions of different *FT*  
292 paralogs (NCBI GenBank accessions; genomic sequences: FJ848913 to FJ848918; promoter  
293 sequences: JX193765, JX193766, JX193767, JX193768) were confirmed with those of the  
294 sequenced *FT* genes on the ‘Darmor’ assembly as well as with published literature (Schiessl  
295 *et al.*, 2014; Wang *et al.*, 2012; Wang *et al.*, 2009). For each accession, the *FT* nucleotide  
296 sequences were aligned using MUSCLE as implemented (Edgar, 2004) in the software  
297 package, Geneious (<https://www.geneious.com>) and estimated for structural variation,  
298 number of polymorphic sites in exons, intron, and promoter regions using ANNOVAR  
299 (Wang *et al.*, 2010). The diversity indices were calculated using the MEGA version 6

300 (Tamura *et al.*, 2013). The Tajima (1989) and Fay and Wu (2000) tests were conducted to  
301 examine whether the frequency spectrum of polymorphic nucleotide mutations conformed to  
302 neutral expectations. The effect of InDel mutations on functional domains was investigated  
303 using information from the NCBI conserved domain database.

304

## 305 **RESULTS**

306

### 307 Natural variation in flowering time across diverse environments

308 We determined the natural variation in flowering time of diverse accessions in two different  
309 environmental conditions across five separate experiments. Across all phenotypic conditions,  
310 we found extensive variation in flowering time, which ranged from as early as 27.6 days up  
311 to more than 139.4 days (Fig. 1, Supplemental Table S5-6). Diverse accessions grown under  
312 LD conditions (16 h light at 20°C) in controlled conditions typically flowered earlier (27.6 to  
313 77 days) compared with SD conditions (44.9 to 139.4 days under 8 h light at 20°C in growth  
314 cabinet) and accessions grown in field conditions (85.2 to 137.1 days). Accessions grown  
315 under rainfed conditions (Condobolin site) flower earlier compared to irrigated sites (Wagga)  
316 Supplemental Table S6. Most of this variation was genetically controlled as the broad sense  
317 heritability ( $h^2$ , also called as reliability) ranged from 45% to 97% across different  
318 environments (Supplemental Table S7). We observed positive genetic correlations ( $r = 0.88$   
319 to 0.96) for flowering time between the different field trials, suggesting that majority of the  
320 genetic variation and underlying mechanisms are shared across field environments (Fig. 2).

### 321 Flowering time variation in canola is largely due to photoperiodic response

322 Under controlled environmental conditions in growth cabinets, LD photoperiod substantially  
323 promoted flowering (27.6 to 77 days) (S1 Table, Fig. 1), while only 23.8% of accessions (n =  
324 86) flowered under short days, suggesting that extended photoperiod is required for  
325 flowering. Analysis of photoperiodic response in accessions enabled us to identify specific  
326 accessions of interest, with robust photoperiod sensitive or insensitive behavior (Fig. 1,  
327 Supplemental Table S5). Only a small proportion (6.8%, n = 25) of accessions did not flower  
328 within 100 days under LD conditions. None of the winter type accessions (e.g., 03-P74,  
329 Beluga, Ding10, FAN28, FAN168, Gundula, Haya, HZAU-1, Maxol, Rangi, Norin-20,  
330 Tower, Zhongshuang-4, Zhongyou 8) either flowered under LD or in SD condition,  
331 reconfirming that vernalisation is essential for flowering in those accessions. This is  
332 consistent with these genotypes being winter/semi-winter type requiring vernalisation to  
333 flower (Raman *et al.*, 2016b).

334 To assess whether there is any differential photoperiodic response, we compared the effects  
335 of photoperiod on flowering time of the accessions grown under controlled environment (CE  
336 cabinets). Four accessions, 9X360-310 (BC15278), Georgie (BC15289), CB-Tanami  
337 (BC52411) and Hylite200TT (BC52662) had variable response compared to others,  
338 suggesting genotype x environment interactions (S1b Table, Supplemental Figure S1).

339

#### 340 **Relationship between flowering time and other traits**

341 To determine whether there is any relationship between flowering time and yield-related  
342 traits in canola, we calculated Pearson correlation coefficients (Fig. 3). There were low  
343 genetic correlations for flowering time between the different field and controlled  
344 environmental conditions, suggesting that phenotyping environment play an important role in  
345 trait expression. Flowering showed a negative correlation with grain yield across sites (WW-  
346 Wagga Wagga and Con: Condoblin) under long day photoperiodic conditions (field and  
347 controlled environments). Early vigour (NDVI.WW) showed positive correlations with  
348 flowering time (0.2 to 0.7) under LD and field conditions (Wagga and Condobolin), and with  
349 grain yield (0.1 to 0.4) depending upon growing environment.

350

#### 351 Population structure in a GWAS panel

352 SNP marker distribution across genome is shown in Supplemental Figure S2; mean marker  
353 density 621.3 per chromosome provided coverage of ~84.7 Kb/marker. Cluster analysis  
354 revealed that at least three main clades among accessions representing European winter,  
355 Australian semi-spring/Canadian spring, and semi-winter of Indian/Chinese origin (Fig. 4,  
356 Supplemental Fig. 3). The first three principal components (PC1 = 38.1%, PC2 = 11.9%, and  
357 PC3 = 5.67%) accounted for 55.7% of the genetic variation and largely resembled the cluster  
358 analysis with similar grouping of accessions (Supplemental Fig. S4). To estimate the extent  
359 of genome-wide LD, we calculated the squared allele frequency correlations (average  $r^2$ ) for  
360 all pairs of the anchored SNPs using an LD window of 500 as 0.02 (Supplementary Fig. S5).  
361 The VanRaden kinship coefficient among accessions ranged from 0.03 to 0.99 suggesting a  
362 wide-range of familial relatedness between pairs of accessions (Supplementary Table S8), as  
363 observed in our previous study (Raman *et al.*, 2016b).

364

#### 365 Genetic architecture of flowering time and photoperiod response

366 Accounting both population structure and kinship information, we identified 142 significant  
367 associations (at the genome-wide significance thresholds of LOD score of  $\geq 3$ ) for flowering

368 time under field (three experiments), LD and SD conditions distributed throughout the  
369 genome, except on chromosome A01 (Supplemental Table S9). Majority of the associated  
370 SNPs (70%) were identified on “A<sub>n</sub>” subgenome (Supplemental Table S10), suggestive of an  
371 uneven distribution on the physical locations of ‘Darmor’ assembly. Most of the associated  
372 SNPs (33.1%) were on chromosome A02 (47 SNPs) followed by 9.15% on (13 SNPs)  
373 explaining majority of allelic variation for flowering time in canola. We identified 22 unique  
374 SNP markers that accounted for associations that were detected repeatedly across multiple  
375 environments (at least 2 environments, Supplemental Table S9). Of the 142 significant  
376 associations, six SNPs crossed the Bonferroni threshold for flowering time in LD conditions,  
377 all of which are located on chromosome A02 (Table 1). Two of these SNPs (Bn-A02-  
378 p9371948 and Bn-A02-p9371633) associated with flowering time under LD conditions were  
379 mapped near the *FT* locus (~0.64 Mb, *BnA02.FT*, *BnaA02g12130D*) (Fig. 5A-C). Under  
380 different phenotypic conditions, we detected different associations; several of these SNP  
381 associations were mapped near the vicinity of genes known to play a regulatory role in *FT*  
382 expression in *A. thaliana* such as *FLC4*, *UPSTREAM OF FLC*, *CO*, *MS11*, *LD*, *MAF4* on  
383 A02; *BnFLC3a*, *CO* and *EMF2* on A03; *NY-YB8* on A04; *GI* on A08; *EMF2* and *CRY2* on  
384 A10, and *CIB1* on C08 (Supplemental Table S11). We identified 28 SNPs that showed  
385 significant association above a LOD of 3 with response to photoperiod identified under  
386 controlled environment cabinet conditions on chromosomes A01, A02, A07, A09, A10, C01,  
387 C03, C06, C08 and C09 (Supplementary Table 11, Fig. 5C), suggesting that these  
388 associations truly reflect genetic determinants of photoperiod response.

389 To identify potential candidates involved in the photoperiod response, we compared the  
390 physical positions of 28 significant SNP associations for photoperiod with the physical  
391 positions of flowering time genes (Supplemental Table S11). Of them, seven SNP markers  
392 map in the vicinity (0.2 Mb) of *SPA3* (A01), *PRR5* (A02), *MAF4* (A02), *ASH1* (A07),  
393 *POWERDRESS* (A10) and *ELF6* (C09), genes underlying photoperiod response in canola  
394 accessions; of which *ANAC029*, *EFF6*, *ABF2*, *FVE*, and *PAF1* were detected in CE  
395 experiments and *ANAC029*, and *ASH1*, were detected (within 200 kb) under field  
396 experiments (S11 Table). Consistent with our previous study (Raman et al 2016a), our results  
397 reinforces that while the major players of flowering time appear to be conserved between  
398 Arabidopsis and canola, the specific roles of the paralogs might be different depending on the  
399 environmental conditions.

400

401 QTL analysis in biparental population identifies loci for flowering time and productivity traits  
402 near *FT* paralogs

403

404 To ensure capturing the relevance of entire genetic architecture of flowering time variation,  
405 we considered the SAgS DH mapping population derived from a BC<sub>1</sub>F<sub>1</sub> cross between  
406 Australian spring type cultivars; Skipton (less responsive to vernalisation) and Ag-Spectrum  
407 (more responsive to vernalisation), which was previously utilised for genetic analyses for  
408 range of traits of interest (Luckett *et al.*, 2011; Raman *et al.*, 2016a; Raman *et al.*, 2013;  
409 Raman *et al.*, 2016c; Raman *et al.*, 2012; Tollenaere *et al.*, 2012). There were moderate to  
410 high genetic correlations for flowering time, early vigour, plant biomass and grain yield  
411 across environments (phenotyping years) in the SAgS DH population (Fig. 6). Flowering  
412 time showed generally negative correlations with grain yield and plant biomass, whereas it  
413 showed positive correlation with early vigour and plant height. We identified several QTL  
414 associated with flowering time, plant emergence, shoot biomass, plant height, and grain yield  
415 across phenotypic environments in the SAgS population (Supplemental Table S12b).

416

417 Since we detected moderate to high genetic correlations in this population between multiple  
418 traits including flowering time (Supplemental Table S13), we considered whether the QTLs  
419 underlying these multiple phenotypes co-localise onto the physical map of *B. napus*. Genetic  
420 and physical localisation of markers on ‘Darmor’ reference genome (Chalhoub *et al.*, 2014)  
421 revealed that three significant QTLs are associated with multiple traits are co-located (Fig. 7).  
422 A multi-trait QTL flanked with 3110489 and 3075574 markers for plant emergence, shoot  
423 biomass, flowering time, and grain yield mapped on chromosomes A07 was located within  
424 0.65Mb of the *FLOWERING LOCUS T* (*FT*, NCBI accession FJ848914.1); *BnA02.FT*  
425 paralog in *B. napus* (Wang *et al.*, 2009). Consistent with GWAS analysis, we detected QTLs  
426 near the *FT* in the biparental population (Fig. 7). Mapping of pleiotropic trait QTL in the  
427 vicinity of *FT* (A07) suggest that *FT* may have multifaceted role in plant development and  
428 productivity traits.

429

430 Expression levels of *FT* paralogs explain significant variation in flowering time

431 To assess whether changes in the expression of different *FT* paralogs could explain the  
432 phenotypic variation in flowering time, we examined expression of *FT* paralogs among field-  
433 grown plants of all 144 DH lines. Expression levels of all 6 *FT* paralogs displayed significant  
434 association with flowering time ( $p < 0.001$ ), with different copies accounting genetic variation

435 for flowering time variably; ranging from 23% (*BnC2.FT*) to *BnC6.FTb* (40%) (Fig. 8A). *FT*  
436 homologues; *BnA7.FTb* and *BnA7.FTa* localised near the multiple trait QTL (Supplemental  
437 Table S12) could explain 30% and 31% of genetic variation in flowering time. Sequence  
438 analyses of the PCR products also confirmed that we are detecting *BnC6.FTb* and *BnA7.FTb*  
439 accurately in our assays.

440

441 To further assess whether a similar pattern is also observed among natural variants, we  
442 assessed the expression of *BnC6.FTb*, which showed the highest correlation in the DH  
443 population and *BnA2.FT2*, which was detected as a QTL in the diversity set of 24 accessions  
444 and *BnFLC.A02* in accessions that differed significantly in their flowering time. Consistent  
445 with the observations seen in QTL analysis and the expression studies in DH populations, we  
446 observed significant differences in *FT* and *FLC* expression that correlated with flowering  
447 time among 24 diverse accessions selected on the basis of flowering time diversity (Fig. 8B).  
448 Consistent with the timing of sample collection (i.e., just prior to flowering), we detected  
449 expression variation in *FT* rather than *FLC* accounted for most of the flowering time variation  
450 in these diverse set of 24 accessions. Taken together these data reveal that irrespective of the  
451 causal variation, the phenotypic variation is associated with changes in the expression levels  
452 of the floral integrator *FT*.

453

454 To unravel further *cis* and *trans* acting candidates associated with differential *FT* transcripts  
455 expression, we first sought SNPs that affect all *FT* homologues expression levels in diverse  
456 canola accessions and then layered this information on the physical map positions of SNPs  
457 associated with genetic variation in flowering time and photoperiod response (Supplementary  
458 Table S14). We identified a total of 13 SNPs mapped on chromosome A07 and C03, in the  
459 vicinity of multiple trait QTLs that we identified in the SAgS population. Candidate genes  
460 that were located near significant SNP associations are *FT*, *ELF4-L2*, *PRR9*, *VIN3*,  
461 *BnFLC.C3b* (*FLC5*, AY036892.1), *FPA*, *SPA1* and *TOE1* (Supplementary Table S11).

462

463 *FT* paralogs exhibit structural sequence variation in *B. napus* accessions

464 In total, nine *FT* copies were identified in *B. napus* accessions (Supplementary Table 15),  
465 including, three putative *FT* copies on chromosomes A01, C02, and C04, (Supplementary  
466 Table S15). Sequence analyses showed considerable variation in level of synonymous and  
467 non-synonymous SNP variations, Insertion-deletions (InDEL) in promoters, as well as exonic  
468 and intronic regions. A total of 310 segregating sites were detected across *FT* paralogs. Our

469 results showed that frequency spectrum of structural variants for *BnA02.FT*, *BnC02.FT* and  
470 *BnC06.FT* conformed to neutral expectations, while *BnC04.FT* and *BnA07.FT* showed non-  
471 conformance to neutrality, suggesting evidence of selection. We detected high level of  
472 diversity in *FT* paralogs mapped on A07, C04 and C06 chromosomes (Supplementary Table  
473 17). For example, *BnC04.FT* (*BnaC04g14850D*) had 35 SNPs in the genomic sequence, of  
474 which the majority of them (21 SNPs) were in intron II. In addition, an 8-bp deletion of the  
475 sequence ‘TTCCGGAA’ at coordinates: 12,437,458 to 12,437,465 bp of the *BnC04.FT* was  
476 identified in exon-IV among seven accessions; Av-Garnet, BC92157, Skipton, Charlton,  
477 BLN3614, ATR-Cobbler, ATR-Gem and in Darmor-*bzh* (reference genotype). As a result,  
478 this deletion creates a frameshift mutation that is most likely to alter gene function; the  
479 frameshift removes the highly conserved C-terminal domain, removing a large proportion of  
480 the PEBP-domain and several substrate-binding sites. Cluster analysis showed that all  
481 variants formed a distinct cluster (Figure 9). In the *BnA07.FTb* (*BnaA07g33120D*) gene, we  
482 identified two indel mutations in the coding region that are unlikely to have major effects on  
483 protein function. The first is a single nucleotide deletion in exon 3 that is heterozygous with  
484 the wild type allele in Australian varieties; Av-Garnet, Skipton, Charlton, BC92156, Marnoo,  
485 BLN3614, Ag-Castle, Monty, Maluka, BLN3343-C00402, CB-Telfer, ATR-Gem,  
486 Surpass402, ThunderTT, ATR-Mako, Wesroona and Ag-Spectrum (the remaining lines are  
487 homozygous wild-type). The deletion results in a frameshift that affects the final 20 amino  
488 acids of the encoded peptide, including the 9 amino acids of the PEBP domain. The second  
489 InDel is a 3 base-pair mutation in exon 1 (His60-deletion) that is found in all our sequenced  
490 lines. These polymorphisms are consisted with the observed QTLs at the vicinity of *FT*.

491

#### 492 Structural variation in *FT* promoter region

493 We further searched CArG box and other motifs for *FLC*, *SOCI* and *CO* which can  
494 potentially bind to repress *FT* expressions (Deng *et al.*, 2011) in introns (especially intron 1)  
495 exons and promoter regions. A putative *CO* binding site within Block A: type II =  
496 ‘ATTGTGGTGATGAGT’ (Wang *et al* 2009) was found in both *BnA02.FT* and *BnC02.FT*  
497 genes. However, this Type-II block ‘A’ sequence was absent in all *FT* paralogs located on to  
498 A07 and C06 chromosomes. There was a single bp deletion in ‘CArG’ box was absent from  
499 in introns 1 of *BnA02.FT* and *BnC02.FT* genes. We also found several ‘CACTA’ elements in  
500 *B. napus FT* paralogs. For example, in the *BnaC04g14850* gene, a total of four motifs were  
501 identified; three were present in introns (2 in Intron 2, antisense direction) and one in sense



502 strand, and one CACTA motif was identified in Exon-IV. In *BnA2.FT*, a total of 834  
503 'CACTA' motifs were identified in promoter, intron 1 and exon II.

504

505 In order to determine whether polymorphism in *FT* directly relates to flowering time  
506 variation, we performed phylogenetic analysis of 21 accessions representing GWAS panel  
507 and parents of mapping populations being used in the Australian Brassica Germplasm  
508 Improvement Program. Our results showed that grouping for both spring and winter types  
509 based on *FT* paralogs was not that distinct (Fig. 10) suggesting that other key flowering genes  
510 such as *FLC* and *FRI* may have contributed to diversification of these morphotypes (Schiessl  
511 *et al.*, 2017; Schiessl *et al.*, 2015).

512

### 513 **DISCUSSION**

514 In this study, we explored the genetic architecture of phenotypic diversity in flowering time  
515 involved in plant development, adaptation and productivity traits. Our results demonstrate  
516 that there is extensive genetically controlled natural variation in flowering time of canola and  
517 is due to response to photoperiod (as revealed from LD and SD conditions) and a  
518 combination of photoperiod and vernalisation response (Fig. 1). Despite of extended  
519 photoperiod at 20°C, several accessions did not flower under CE conditions suggesting that  
520 these accessions require vernalisation and flowered when exposed to extended periods of cold  
521 temperatures (Raman *et al* 2016). In order to have a minimum effect of vernalisation on  
522 flowering time, all field trials were conducted in the middle of June (instead of April –the  
523 main canola growing season in Australia); we identified a highly significant QTL close to *FT*  
524 locus on chromosome A02, as identified under CE conditions in LD conditions, suggesting  
525 that *FT* is a major candidate for flowering time across different growing conditions (Fig 4).  
526 This QTL was also mapped within 80 Kb from QTL for vernalisation response in our  
527 previous study (Raman *et al.*, 2016b), suggesting that *FT* integrates signals both from  
528 photoperiod and vernalisation pathways in canola. The functional role of *FT* was determined  
529 using quantitative RT-PCR using six *FT* paralog specific primers. Our results demonstrated  
530 that all paralogs underlie genetic variation in flowering time in canola. For the first time, we  
531 showed *FT* expression in a canola population grown under field conditions is significantly  
532 associated with variation in flowering time. It was interesting to observe that most of  
533 variation in flowering time was explained by A02 locus in GWAS, and A2 and A07 loci near  
534 *FT* paralogs in the SAgS DH mapping population (Fig. 6, Supplementary Table S12).  
535 However, the maximum correlation ( $R^2 = 0.4$ ) was observed for *BnC6.FTb* homologue,

536 followed by *BnA7.FTb* ( $R^2 = 0.31$ ), *BnA7.FTa* ( $R^2 = 0.30$ ), *BnC6.FTa* ( $R^2 = 0.29$ ), *BnA2.FT*  
537 ( $R^2 = 0.26$ ), and *BnC2.FT* ( $R^2 = 0.23$ ). Higher correlation among different paralogs suggested  
538 that different copies can substitute allelic effect on flowering time. Unlike previous studies  
539 (Guo *et al.*, 2014; Wang *et al.*, 2012), our results showed that all copies of *FT* are functional.  
540 Although all *FT* paralogs except *BnC6.FTa* and *BnC6.FTb* map at the same positions of the  
541 closest relative of *FT*, *TWIN SISTER OF FT (TSF)*, cloning of six paralogs of *FT* in canola  
542 (Wang *et al.*, 2012; Wang *et al.*, 2009) discounted the possibility of *TSF* controlling variation  
543 in flowering time which is shown expressed at much lower levels than *FT* (Jang *et al.*, 2009;  
544 Michaels *et al.*, 2005; Yamaguchi *et al.*, 2005). No sequence variation was observed in the  
545 *FT* paralogs located on chromosomes A01 and C02 among 21 accessions sequenced.  
546 Previously, it was reported that these paralogs are evolved may have retained or lost gene  
547 function in the polyploid genome of canola (Wang *et al.* 2009).

548

549 We also showed that *FT* has multifaceted role in different plant development, flowering and  
550 grain yield, as several QTL were localized in a cluster and *FT* gene expression has shown a  
551 good correlation with different traits. However, this relationship was dependent upon  $G \times E$   
552 interaction (Supplemental Fig. 1). In canola, sequence variation for *BnFLC.A10* appears to  
553 underlie QTL for both flowering time as well as root biomass (Fletcher *et al.*, 2016; Fletcher  
554 *et al.*, 2015). In addition, flowering time has been implicated in plasticity of water-use  
555 efficiency, carbohydrate availability, plant vigour, resistance to diseases and yield (Graf *et*  
556 *al.*, 2010; Kenney *et al.*, 2014; Ni *et al.*, 2009; Wei *et al.*, 2014). We propose that alleles  
557 which showed significantly association with flowering time and grain yield in water-limited  
558 environments in 2013 and 2014 are of highly relevance even they did not reveal genetic  
559 associations in water-unlimited (non-stress environment, 2015 and 2016) and could be  
560 exploited in canola breeding programs. Stress environments tend to drive changes in  
561 flowering time in Brassica as a result of change in allele frequencies at the flowering time  
562 genes (Franks *et al.*, 2016; Franks *et al.*, 2007).

563

564 Our findings reveal that the genetic architecture of natural variation in flowering time  
565 involves multiple alleles having major effects located near *FT*, *UPSTREAM OF FLC* and  
566 *RAV2* genes on chromosome A02 (Table 1). This is in contrast to genetic variation due to  
567 vernalisation requirement which is controlled by multiple alleles across genome (Long *et al.*,  
568 2007; Raman *et al.*, 2016b; Raman *et al.*, 2013). Several SNP markers based on Illumina  
569 Infinium array were located near the QTL associated with trait variation and known flowering

570 time genes (Bernier and Perilleux, 2005; Dennis and Peacock, 2007; Michaels, 2009). Based  
571 on their photoperiodic response, all genotypes could be grouped into photoperiod sensitive,  
572 photoperiod insensitive (less sensitive), and non-flowering requiring vernalisation. Clustering  
573 of such genotypes based on flowering habit was also supported with our molecular marker  
574 based phenetic analysis. The majority of winter types originating from Europe, China and  
575 Japan and requiring an extended period of vernalisation to flower seem to be derived from a  
576 single cluster (cluster II).

577

578 In summary, we have demonstrated through a series of complementary and exploratory  
579 analyses based on association tests using genome-wide SNPs, expression QTL and  
580 quantitative RT-PCR that the natural variation in flowering time and response to photoperiod  
581 revealed in this study is controlled by *FT* and other loci dispersed across the genome, and  
582 modulated by the environment. GWA approach delineated genomic regions and provided  
583 insights into the genetic architecture of flowering time that control flowering time and its  
584 multifaceted role in plant development and productivity traits. Although, some alleles which  
585 were identified may not be causative but could be used as selection tools to increase rate of  
586 genetic gain in canola improvement programs.

587

### 588 **Acknowledgments**

589 HR thanks Dr. Bev Orchard NSW DPI for advice on controlled environment experiment  
590 designs, Dr. Phil Salisbury (DEDJTR and University of Melbourne) for providing seeds of  
591 DHC2211 and DHC2261, Mr. Chris Fuller, Mr. Dean McCallum, and Daryl Reardon (NSW  
592 Department of Primary Industries) for carrying-out NDVI, and Kristin Verstermark for help  
593 with RNA extractions. HR is thankful to Drs Andrzej Killian, Jie Song and Andrew  
594 Kowalczyk for supporting KDCCompute pipeline for genetic analyses.

595

596 This work was supported by grants from the Grains Research and Development Corporation  
597 (DAN00117, DAN00208) and NSW Agricultural Genomic Centre, BioFirst Initiative of  
598 NSW Government, Australia to HR. SS is supported by an ARC-Australian Post-Doctoral  
599 Fellowship (DP110100964) and SB is supported by an ARC-Future Fellowship  
600 (FT100100377), Larkins Fellowship and a Linkage Development Scheme from Monash  
601 University.

602

### 603 **Authors contributions**

604 HR conceived the research idea and plans; HR, RR, YQ, OO, and IM carried out the  
605 phenotypic experiments; HR and RR conducted genotypic analysis; LB, RM, RR and HR  
606 analysed data and carried-out trait-marker associations; HR and RR conducted comparative  
607 mapping; ASV, SS, HR and SB performed *FT* and *FLC* analyses, HR and DW performed  
608 bioinformatics analysis; HR prepared the draft and SB revised it. All authors read/commented  
609 the manuscript.

610

611

## 612 **Figure Legends**

613

614 **Fig. 1** Natural variation for flowering time. Box-plots showing genetic variation for flowering  
615 time in a diverse panel of canola accessions grown across five experiments under field, and  
616 controlled environment conditions (cabinets). Days to flowering were scored in 2016 (Field  
617 plots at Wagga Wagga (flood irrigated) and Condobolin (Condo); Single rows at Wagga site  
618 under lateral move irrigation); Days to flowering were scored in long day condition (LD, 16  
619 h) and short day condition (SD) plants under cabinets. Black dots indicate genotypes that did  
620 not flower till the end of experiment and were marked as lowering were scored in 2016 (Field  
621 plots at Wagga Wagga (flood irrigate flowering time under LD and SD conditions, while 300  
622 accessions were evaluated under field conditions. Details are given in Supplementary Table  
623 1.

624

625 **Fig. 2** Pearson correlation for flowering time among 300 accessions of canola evaluated in  
626 field plots across different environments. Flowering time (days to flower, DTF) was assessed  
627 thrice in a week. A) Flowering time correlation between field trials that were irrigated with  
628 lateral move or via flooding. B) Flowering time correlation between field trials at flood  
629 irrigated plots at Wagga with rainfed plots at Condobolin. C) Flowering time correlation  
630 between laterally irrigated plots at Wagga and rainfed plots at Condobolin and D) Frequency  
631 distribution of canola accessions based on the days to first flower under the varied conditions.

632

633 **Fig. 3** Molecular diversity in a GWAS panel of 368 *Brassica napus* accessions. (A). Three  
634 dominant clusters shown in different shades; violet, red and light green colors represent  
635 predominantly Australian, European, and Indo-Chinese origins cultivars, respectively. Details  
636 are given in supplementary Table S1. Tree was drawn with MEGA 6 package.

637

638 **Fig. 4** Manhattan plots for the detected associations for flowering time. Plots show genome-  
639 wide  $P$  values for associations between SNP markers and flowering time: (A) Field condition  
640 at Condobolin, Australia, (B) long-day conditions in controlled environment cabinet and (C)  
641 response to photoperiod. Different colors represent different chromosomes of *B. napus* (A1-  
642 A10, C1-C9). Significant associations -  $\log_{10}(p)$  value of  $\leq 4$  are shown with a solid  
643 horizontal line (in black color).

644

645 **Fig. 5** Distribution of flowering time variation in the biparental mapping population. Pair-  
646 plots showing genetic correlation of EBLUPS (empirical best linear unbiased estimators)  
647 from the univariate analysis of flowering time and grain yield among 144 doubled haploid  
648 lines of *B. napus* population derived from Skipton/Ag-Spectrum//Skipton. DH lines were  
649 grown across 4 phenotypic environments (2013-2016) in field plots, 2013 at Euberta, NSW,  
650 Australia; 2014 at Wagga Wagga, NSW, Australia (Raman et al 2016), 2015 and 2016 at the  
651 Wagga Wagga (this study).

652

653 **Fig. 6** Graphical representation showing localisation of multi-trait QTL for plant emergence  
654 (PE); above ground shoot biomass (SB); flowering time (days to flower, DTF); plant height  
655 (PHT) and grain yield (GY) in a doubled haploid population from Skipton/Ag-  
656 Spectrum//Skipton. DArTseq markers and their genetic map positions are shown on right-  
657 and left-hand side, respectively. Solid lines (in blue and red colour) represent to markers that  
658 showed significant associations with traits of interest. Map distances are given in cM and  
659 displayed using the MapChart.

660

661 **Fig. 7** *FT* is a major determinant of flowering time variation and photoperiod gene in canola  
662 varieties. A), Expression analysis of different *FT* paralogs (*BnA2.FTa*, *BnC2.FT*, *BnA7.FTa*,  
663 *BnA7.FTb*, *BnC6.FTa*, *BnC6.FTb*) on leaves taken from field grown plants of 144 doubled  
664 haploid lines of Skipton/Ag-Spectrum//Skipton, and its correlation with flowering time. B),  
665 Expression analyses of *FT* genes; *BnC6.FTb* (chromosome C6) and *BnA2.FT* (chromosome  
666 A02) and *BnFLC2* on leaves taken from LD grown plants of 24 diverse accessions,  
667 representing flowering time diversity in a GWAS panel. The relative expression levels of  
668 *FT* and *FLC* after normalisation with the reference *UBC9*, is plotted against flowering time.

669

670 **Fig. 8** Graphical representation showing structural variation in the *BnC04.FT* gene  
671 (*BnC04g14850D*) among 22 accessions of canola. Variants (blue triangle) in exons

672 (rectangular box) and introns (blue solid line) are shown. Change in amino acid substitution  
673 is shown. Details of sequenced accessions are given in Supplementary Table S1.

674

675 **Fig. 9** Neighbour-joining tree based on nucleotide variation across all *FT* paralogs among 21  
676 accessions of *Brassica napus* representing GWAS and parental lines (shown in red color) of a  
677 doubled haploid population derived from Skipton/Ag-Spectrum//Skipton. Tree was generated  
678 in MEGA 6. Nucleotide variation in *FT* genes was also compared with the corresponding *FT*  
679 genes in the reference Darmor cultivar, in colour. Number refers to percent bootstrap support  
680 for branches with greater than 50% support.

681

## 682 **Supplemental Tables**

683

684 **Table S1** Accessions used to reveal natural variation in flowering time and photoperiodic  
685 response.

686

687

688 **Table S2** Details for phenotyping, experimental designs and QTL analysis

689

690 **Table S3** Mean marker density of Illumina SNP markers genotyped in a canola GWAS panel  
691 of 368 accessions.

692

693 **Table S4** PCR primers used for expression analysis by RT-qPCR (Guo et al 2014)

694

695 **Table S5** *Brassica napus* genome BLAT HITs against the *Arabidopsis thaliana*  
696 *FLOWERING LOCUS T* (AT1G65480.1, RSB8/FT/chr1:24331428-24333935) using Darmor  
697 reference assembly (<http://www.genoscope.cns.fr/blat-server/cgi-bin/colza/webBlat>). *FT*  
698 paralogs identified in a previous study (Schiessl et al 2014) are also shown for comparison.

699

700 **Table S6** (A) Natural variation in flowering time in a GWAS panel of 368 lines of *B. napus*  
701 grown under controlled environment cabinets under short day (8 h light and 16 h dark) and  
702 long day (16 h light and 8 h dark); (B) Supplemental Table S6b Table. Natural variation in  
703 flowering time in a GWAS panel of 300 lines of *B. napus* grown under field conditions. -  
704 represents to missing data and (C) Supplemental Table S6C Table: Broad sense heritability of  
705 flowering time under controlled and field condition among canola accessions.

706

707 **Table S7** Marker LD across *B. napus* genome.

708

709 **Table S8** Familial relationships between pairs of accessions used for GWAS.

710

711 **Table S9** Marker trait association identified for flowering time and photoperiodic response in  
712 a GWAS panel of canola. Response to photoperiod was assessed under controlled  
713 environment conditions, LD: Long day conditions (16 h light, 8 hr dark at 20 degree); SD (8  
714 h light, 16 h dark at 20 degree). Flowering time was also evaluated under field conditions at  
715 three sites: Wagga Wagga (irrigation, NSW, Australia), Wagga Wagga (lateral site) and  
716 Condobolin (rainfed site, NSW, Australia) Days to flowering was used for GWAS analysis  
717 using GAPIT program in R and Golden Helix (SVS, with and without principal component  
718 analysis).

719

720 **Table S10** Distribution of significant marker associations for flowering time and photoperiod  
721 response, evaluated under controlled environment cabinets and field conditions (three sites)  
722 in a GWAS panel of canola

723

724 **Table S11** Candidate gene associated with flowering time and photoperiodic response in the  
725 GWAS and DH population.

726

727 **Table S12** Significant QTL associated with flowering time and grain yield identified in a  
728 doubled haploid population derived from a single BC<sub>1</sub>F<sub>1</sub> from the Skipton/Ag-  
729 Spectrum//Skipton population grown in four environments, at Euberta (2013) and Wagga  
730 Wagga (2014, 2015 and 2016). QTL in bold are repeatedly detected across  
731 environments/traits. QTL in bold and italics are multi-trait QTL (pleiotropic).

732

733 **Table S13** Genetic correlation between different traits measured in the doubled haploid  
734 population from Skipton/Ag-Spectrum//Skipton across environments.

735

736 **Table S14** Genome-wide association analysis (eQTL) showing statistical association between  
737 Illumina SNP markers and expression data of *BnC6.FT* gene in 300 accessions of *B. napus*.  
738 Linear marker regression analysis was performed in the SVS package (Golden Helix).

739

740 **Table S15** Summary of structural and polymorphic variation identified among 21 *B. napus*  
741 accessions representing GWAS and validation population used in this study. Numbers in  
742 table represent counts of unique variants observed across the 21 accessions. Abbreviations:  
743 SNV: structural nucleotide variant, InDel: Insertion-deletion, S = Number of segregating  
744 sites,  $ps = S/n$ ,  $\Theta = ps/a1$ ,  $\pi$  = nucleotide diversity, and D is the Tajima test statistic (Tajima,  
745 1989).

746

747 **Table S16** Gene structures of different *FT* paralogs identified in the resequence data from 21  
748 accessions of *B. napus* (test samples). Exon/intron genomic coordinates of the *B. napus*  
749 reference cultivar are based on the current gene models (annotation version 5). Numbers in  
750 the table represent lengths in base-pairs. Exon/intron length variation in the 21 accessions (in  
751 bold) is only counted for InDels that are homozygous.

752

## 753 **References**

- 754 **Alonso-Blanco C, Aarts MGM, Bentsink L, Keurentjes JJB, Reymond M,**  
755 **Vreugdenhil D, Koornneef M.** 2009. What Has Natural Variation Taught Us about  
756 Plant Development, Physiology, and Adaptation? *The Plant Cell* **21**, 1877-1896.
- 757 **Atwell S, Huang YS, Vilhjalmsson BJ, Willems G, Horton M, Li Y, Meng D, Platt**  
758 **A, Tarone AM, Hu TT, Jiang R, Mulyati NW, Zhang X, Amer MA, Baxter I, Brachi**  
759 **B, Chory J, Dean C, Debieu M, de Meaux J, Ecker JR, Faure N, Kniskern JM,**  
760 **Jones JDG, Michael T, Nemri A, Roux F, Salt DE, Tang C, Todesco M, Traw MB,**  
761 **Weigel D, Marjoram P, Borevitz JO, Bergelson J, Nordborg M.** 2010. Genome-  
762 wide association study of 107 phenotypes in *Arabidopsis thaliana* inbred lines.  
763 *Nature* **465**, 627-631.
- 764 **Bernier G, Perilleux C.** 2005. A physiological overview of the genetics of flowering  
765 time control. *Plant Biotechnology Journal* **3**, 3-16.
- 766 **Cabrera-Bosquet L, Molero G, Stellacci AM, Bort J, Nogues S, J.L. A.** 2011.  
767 NDVI as a potential tool for predicting biomass, plant nitrogen content and growth in  
768 wheat genotypes subjected to different water and nitrogen conditions. *Cereal*  
769 *Research Communications* **39**, 147–159. doi:10.1556/CRC.39.2011.1.15.
- 770 **Chalhoub B, Denoeud F, Liu S, Parkin IAP, Tang H, Wang X, Chiquet J,**  
771 **Belcram H, Tong C, Samans B, M. Corr ea CDS, J. Just, C. Falentin, C. S. Koh, I.**  
772 **Le Clainche, M. Bernard, P. Bento, B. Noel, K. Labadie, A. Alberti, M. Charles,**  
773 **D. Arnaud, H. Guo, C. Daviaud, S. Alamery, K. Jabbari, M. Zhao, P. P. Edger, H.**  
774 **Chelaifa, D. Tack, G. Lassalle, I. Mestiri, N. Schnell, M.-C. Le Paslier, G. Fan, V.**  
775 **Renault, P. E. Bayer, A. A. Golicz, S. Manoli, T.-H. Lee, V. Ha Dinh Thi, S.**  
776 **Chalabi, Q. Hu, C. Fan, R. Tollenaere, Y. Lu, C. Battail, J. Shen, C. H. D.**  
777 **Sidebottom, X. Wang, A. Canaguier, A. Chauveau, A. B rard, G. Deniot, M.**  
778 **Guan, Z. Liu, F. Sun, Y. P. Lim, E. Lyons, C. D. Town, I. Bancroft, X. Wang, J.**  
779 **Meng, J. Ma, J. C. Pires, G. J. King, D. Brunel, R. Delourme, M. Renard, J.-M.**  
780 **Aury, K. L. Adams, J. Batley, R. J. Snowdon, J. Tost, D. Edwards, Y. Zhou, W.**



- 781 **Hua, A. G. Sharpe, A. H. Paterson, C. Guan, P. Wincker.** 2014. Early allopolyploid  
782 evolution in the post-Neolithic *Brassica napus* oilseed genome. *Science* **345**.
- 783 **Clarke WE, Higgins EE, Plieske J, Wieseke R, Sidebottom C, Khedikar Y, Batley**  
784 **J, Edwards D, Meng J, Li R, Lawley CT, Pauquet J, Laga B, Cheung W, Iniguez-**  
785 **Luy F, Dyrzka E, Rae S, Stich B, Snowdon RJ, Sharpe AG, Ganal MW, Parkin**  
786 **IAP.** 2016. A high-density SNP genotyping array for *Brassica napus* and its ancestral  
787 diploid species based on optimised selection of single-locus markers in the  
788 allotetraploid genome. *Theoretical and Applied Genetics* **129**, 1887-1899.
- 789 **Coombes NE.** 2002. The reactive tabu search for efficient correlated experimental  
790 designs. PhD thesis, John Moores University, Liverpool UK.
- 791 **Cowley RB, Luckett DJ, Moroni JS, Zeleke K, Diffey S.** 2014. Remote sensing of  
792 early vigour in canola germplasm: relationship to grain yield and potential to select  
793 for drought tolerance. *Crop and Pasture Science* **65**(12) 1288-1299  
794 <https://doi.org/10.1071/CP14055>.
- 795 **Deng W, Ying H, Helliwell CA, Taylor JM, Peacock WJ, Dennis ES.** 2011.  
796 FLOWERING LOCUS C (FLC) regulates development pathways throughout the life  
797 cycle of *Arabidopsis*. *Proceedings of the National Academy of Sciences* **108** 6680-  
798 6685
- 799 **Dennis ES, Peacock WJ.** 2007. Epigenetic regulation of flowering. *Current Opinion*  
800 *in Plant Biology* **10**, 520-527.
- 801 **Edgar RC.** 2004. MUSCLE: multiple sequence alignment with high accuracy and  
802 high throughput. *Nucleic Acids Res.* **32**(5):1792-1797.
- 803 **Fay JC, Wu CI.** 2000. Hitchhiking under positive Darwinian selection. *Genetics* **155**,  
804 1405-1413.
- 805 **Ferreira ME, Satagopan J, Yandell BS, Williams PH, Osborn TC.** 1995. Mapping  
806 loci controlling vernalisation requirement and flowering time in *Brassica napus*. *Theor*  
807 *Appl Genet* **90**, 727-732.
- 808 **Fletcher RS, Herrmann D, Mullen JL, Li Q, Schrider DR, Price N, Lin J, Grogan**  
809 **K, Kern A, McKay JK.** 2016. Identification of polymorphisms associated with  
810 drought adaptation QTL in *Brassica napus* by resequencing. *G3:*  
811 *Genes|Genomes|Genetics* **6**, 793-803.
- 812 **Fletcher RS, Mullen JL, Heiliger A, McKay JK.** 2015. QTL analysis of root  
813 morphology, flowering time, and yield reveals trade-offs in response to drought in  
814 *Brassica napus*. *Journal of Experimental Botany* **66**, 245–256,  
815 <https://doi.org/210.1093/jxb/eru1423>.
- 816 **Franks SJ, Kane NC, O'Hara NB, Tittes S, Rest JS.** 2016. Rapid genome-wide  
817 evolution in *Brassica rapa* populations following drought revealed by sequencing of  
818 ancestral and descendant gene pools. *Mol Ecol* **25**, 3622-3631.
- 819 **Franks SJ, Sim S, Weis AE.** 2007. Rapid evolution of flowering time by an annual  
820 plant in response to a climate fluctuation. *Proc Natl Acad Sci U S A* **104**, 1278-1282.
- 821 **Graf A, Schlereth A, Stitt M, Smith AM.** 2010. Circadian control of carbohydrate  
822 availability for growth in *Arabidopsis* plants at night. *Proceedings of the National*  
823 *Academy of Sciences* **107**, 9458-9463.
- 824 **Guo Y, Hans H, Christian J, Molina C.** 2014. Mutations in single *FT*- and *TFL1*-  
825 paralogs of rapeseed (*Brassica napus* L.) and their impact on flowering time and  
826 yield components. *Frontiers in Plant Science* **5**, 282.
- 827 **Hou J, Long Y, Raman H, Zou X, Wang J, Dai S, Xiao Q, Li C, Fan L, Liu B,**  
828 **Meng J.** 2012. A Tourist-like MITE insertion in the upstream region of the  
829 *BnFLC.A10* gene is associated with vernalization requirement in rapeseed (*Brassica*  
830 *napus* L.). *BMC Plant Biology* **12**, 238.

- 831 **Jang S, Torti S, Coupland G.** 2009. Genetic and spatial interactions between FT,  
832 TSF and SVP during the early stages of floral induction in *Arabidopsis*. *Plant Journal*  
833 **60**, 614-625.
- 834 **Kang HM.** 2008. Efficient control of population structure in model organism  
835 association mapping. *Genetics* **178**, 1709-1723.
- 836 **Kenney AM, McKay JK, Richards JH, Juenger TE.** 2014. Direct and indirect  
837 selection on flowering time, water-use efficiency (WUE,  $\delta$  13C), and WUE plasticity  
838 to drought in *Arabidopsis thaliana* *Ecology and Evolution* **4**, 4505-4521.
- 839 **Kinoshita T, Ono N, Hayashi Y, Morimoto S, Nakamura S, Soda M, Kato Y,**  
840 **Ohnishi M, Nakano T, Inoue S-i, Shimazaki K-i.** *FLOWERING LOCUS T* regulates  
841 stomatal opening. *Current Biology* **21**, 1232-1238.
- 842 **Koornneef M, Alonso-Blanco C, Blankestijn-de Vries H, Hanhart CJ, Peeters**  
843 **AJM.** 1998. Genetic interactions among late-flowering mutants of *Arabidopsis*.  
844 *Genetics* **148**, 885-892.
- 845 **Koornneef M, Alonso-Blanco C, Vreugdenhil D.** 2004. Naturally occurring genetic  
846 variation in *Arabidopsis thaliana*. *Annu Rev Plant Biol* **55**: 141–172.
- 847 **Koornneef M, Hanhart CJ, Veen JH.** 1991. A genetic and physiological analysis of  
848 late flowering mutants in *Arabidopsis thaliana*. *Molecular and General Genetics* **229**,  
849 57-66.
- 850 **Krieger U, Lippman ZB, Zamir D.** 2010. The flowering gene SINGLE FLOWER  
851 TRUSS drives heterosis for yield in tomato. *Nat Genet* **42**, 459-463.
- 852 **Lee R, Baldwin S, Kenel F, McCallum J, Macknight R.** 2013. *FLOWERING*  
853 *LOCUS T* genes control onion bulb formation and flowering. *Nat Commun.* **4**:2884.  
854 doi: 10.1038/ncomms3884.
- 855 **Lifschitz E, Eviatar T, Rozman A, Shalit A, Goldshmidt A, Amsellem Z, Alvarez**  
856 **JP, Eshed Y.** 2006. The tomato FT ortholog triggers systemic signals that regulate  
857 growth and flowering and substitute for diverse environmental stimuli. *Proceedings of*  
858 *the National Academy of Sciences of the United States of America* **103**, 6398–6403.
- 859 **Lipka AE, Tian F, Wang Q, Peiffer J, Li M, Bradbury PJ, Gore MA, Buckler ES,**  
860 **Zhang Z.** 2012. GAPIT: genome association and prediction integrated tool.  
861 *Bioinformatics* **28**, 2397-2399.
- 862 **Long Y, Shi J, Qiu D, Li R, Zhang C, Wang J, Hou J, Zhao J, Shi L, Park B-S,**  
863 **Choi SR, Lim YP, Meng J.** 2007. Flowering time quantitative trait loci analysis of  
864 oilseed brassica in multiple environments and genomewide alignment with  
865 *Arabidopsis*. *Genetics* **177**, 2433-2444.
- 866 **Luckett DJ, Cowley R, Moroni S, Raman H.** 2011. Improving water-use efficiency  
867 and drought tolerance in canola - potential contribution from improved carbon  
868 isotope discrimination (CID). *Proceedings of the 13th International Rapeseed*  
869 *Congress, Prague.*
- 870 **Michaels SD.** 2009. Flowering time regulation produces much fruit. *Curr Opin Plant*  
871 *Biol* **12**, 75 - 80.
- 872 **Michaels SD, Himelblau E, Kim SY, Schomburg FM, Amasino RM.** 2005.  
873 Integration of Flowering Signals in Winter-Annual *Arabidopsis*. *Plant Physiology* **137**,  
874 149-156.
- 875 **Navarro C, Abelenda JA, Cruz-Oro E, Cuellar CA, Tamaki, S., Silva, J. ,**  
876 **Shimamoto K, Prat S.** 2011. Control of flowering and storage organ formation in  
877 potato by *FLOWERING LOCUS T*. *Nature* **478**, 119–122.

- 878 **Nelson MN, Rajasekaran R, Smith A, Chen S, Beeck CP, Siddique KHM,**  
879 **Cowling WA.** 2014. Quantitative Trait Loci for Thermal Time to Flowering and  
880 Photoperiod Responsiveness Discovered in Summer Annual-Type *Brassica napus* L.  
881 PLoS ONE **9**, e102611.
- 882 **Ni Z, Kim E-D, Ha M, Lackey E, Liu J, Zhang Y, Sun Q, Chen ZJ.** 2009. Altered  
883 circadian rhythms regulate growth vigour in hybrids and allopolyploids. *Nature* **457**,  
884 327-331.
- 885 **Pin PA, Nilsson O.** 2012. The multifaceted roles of FLOWERING LOCUS T in plant  
886 development. *Plant, Cell & Environment* **35**, 1742-1755.
- 887 **Raman H, Raman R, Coombes N, Song J, Diffey S, Kilian A, Lindbeck K,**  
888 **Barbulescu DM, Batley J, Edwards D, Salisbury PA, Marcroft S.** 2016a.  
889 Genome-wide association study identifies new loci for resistance to *Leptosphaeria*  
890 *maculans* in canola. *Frontiers in Plant Science* **7**, 1513.
- 891 **Raman H, Raman R, Coombes N, Song J, Prangnell R, Bandaranayake C,**  
892 **Tahira R, Sundaramoorthi V, Killian A, Meng J, Dennis ES, Balasubramanian S.**  
893 2016b. Genome-wide association analyses reveal complex genetic architecture  
894 underlying natural variation for flowering time in canola. *Plant, Cell & Environment*  
895 **39**, 1228-1239.
- 896 **Raman H, Raman R, Diffey S, Qiu Y, McVittie B, Barbulescu DM, Salisbury PA,**  
897 **Marcroft S, Delourme R.** 2018. Stable Quantitative Resistance Loci to Blackleg  
898 Disease in Canola (*Brassica napus* L.) Over Continents. *Frontiers in Plant Science* **9**.
- 899 **Raman H, Raman R, Eckermann P, Coombes N, Manoli S, Zou X, Edwards D,**  
900 **Meng J, Prangnell R, Stiller J, Batley J, Luckett D, Wratten N, Dennis E.** 2013.  
901 Genetic and physical mapping of flowering time loci in canola (*Brassica napus* L.).  
902 *Theoretical and Applied Genetics* **126**, 119-132.
- 903 **Raman H, Raman R, Kilian A, Detering F, Carling J, Coombes N, Diffey S,**  
904 **Kadkol G, Edwards D, McCully M, Ruperao P, Parkin IAP, Batley J, Luckett DJ,**  
905 **Wratten N.** 2014. Genome-Wide Delineation of Natural Variation for Pod Shatter  
906 Resistance in *Brassica napus*. PLoS ONE **9**, e101673.
- 907 **Raman R, Diffey S, Carling J, Cowley R, Kilian A, Luckett D, Raman H.** 2016c.  
908 Quantitative genetic analysis of yield in an Australian *Brassica napus* doubled  
909 haploid population. *Crop & Pasture Science* **67**, 298-307.
- 910 **Raman R, Taylor B, Marcroft S, Stiller J, Eckermann P, Coombes N, Rehman A,**  
911 **Lindbeck K, Luckett D, Wratten N, Batley J, Edwards D, Wang X, Raman H.**  
912 2012. Molecular mapping of qualitative and quantitative loci for resistance to  
913 *Leptosphaeria maculans*; causing blackleg disease in canola (*Brassica napus* L.).  
914 *Theor. Appl. Genet.* **125**, 405-418.
- 915 **Rutkoski JE, Poland J, Jannink J-L, Sorrells ME.** 2013. Imputation of unordered  
916 markers and the impact on genomic selection accuracy. *G3* **3**, 427-439. doi:  
917 410.1534/g1533.1112.005363.
- 918 **Saitou N, Nei M.** 1987. The neighbor-joining method: a new method for  
919 reconstructing phylogenetic trees. *Molecular Biology and Evolution* **4**, 406 - 425.
- 920 **Schiessl S, Huettel B, Kuehn D, Reinhardt R, Snowdon R.** 2017. Post-  
921 polyploidisation morphotype diversification associates with gene copy number  
922 variation. *Scientific Reports* **7**, 41845.
- 923 **Schiessl S, Iniguez-Luy F, Qian W, Snowdon RJ.** 2015. Diverse regulatory factors  
924 associate with flowering time and yield responses in winter-type *Brassica napus*.  
925 *BMC Genomics* **16**, 737.

- 926 **Schiessl S, Samans B, Hüttel B, Reinhardt R, Snowdon RJ.** 2014. Capturing  
927 sequence variation among flowering-time regulatory gene homologues in the  
928 allopolyploid crop species *Brassica napus*. *Frontiers in Plant Science* **5**.  
929 **Shalit A, Rozman A, Goldshmidt A, Alvarez JP, Bowman JL, Eshed Y, Lifschitz**  
930 **E.** 2009. The flowering hormone florigen functions as a general systemic regulator of  
931 growth and termination. *Proceedings of the National Academy of Sciences of the*  
932 *United States of America* **106**, 8392-8397.  
933 **Tadege M, Sheldon C, Helliwell C, Stoutjesdijk P, Dennis E, Peacock W.** 2001.  
934 Control of flowering time by *FLC* orthologues in *Brassica napus*. *Plant Journal* **28**,  
935 545-553.  
936 **Tajima F.** 1989. Statistical methods to test for nucleotide mutation hypothesis by  
937 DNA polymorphism. *Genetics* **123**, 585-595.  
938 **Tamura K, Stecher G, Peterson D, A. F, S. K.** 2013. MEGA6: Molecular  
939 Evolutionary Genetics Analysis version 6.0. *Molecular Biology and Evolution* **30**:  
940 2725-2729.  
941 **Team RDC.** 2014. R: A language and environment for statistical computing. R  
942 Foundation for Statistical Computing, Vienna, Austria. ISBN 3-900051-07-0, URL  
943 <http://www.R-project.org/>.  
944 **Tollenaere R, Hayward A, Dalton-Morgan J, Campbell E, Lee JRM, Lorenc M,**  
945 **Manoli S, Stiller J, Raman R, Raman H, Edwards D, Batley J.** 2012. Identification  
946 and characterization of candidate *Rlm4* blackleg resistance genes in *Brassica napus*  
947 using next-generation sequencing. *Plant Biotechnology Journal* **10**, 709-715.  
948 **Wang J, Hopkins CJ, Hou J, Zou X, Wang C, Long Y, Kurup S, King GJ, Meng J.**  
949 2012. Promoter variation and transcript divergence in Brassicaceae lineages of  
950 FLOWERING LOCUS T. *PLoS ONE* **7**, e47127.  
951 **Wang J, Long Y, Wu B, Liu J, Jiang C, Shi L, Zhao J, King GJ, Meng J.** 2009.  
952 The evolution of *Brassica napus* FLOWERING LOCUS T paralogues in the context  
953 of inverted chromosomal duplication blocks. *BMC Evol Biol* **9**, 271.  
954 **Wang K, Li M, Hakonarson H.** 2010. ANNOVAR: Functional annotation of genetic  
955 variants from next-generation sequencing data. *Nucleic Acids Research* **38**:e164.  
956 **Wang N, Qian W, Suppanz I, Wei L, Mao B, Long Y, Meng J, Muller AE, Jung C.**  
957 2011. Flowering time variation in oilseed rape (*Brassica napus* L.) is associated with  
958 allelic variation in the FRIGIDA homologue *BnaA.FRI.a*. *J Exp Bot* **62**, 5641 - 5658.  
959 **Wei D, Mei J, Fu Y, Disi J, Li J, Qian W.** 2014. Quantitative trait loci analyses for  
960 resistance to *Sclerotinia sclerotiorum* and flowering time in *Brassica napus*.  
961 *Molecular Breeding* **34**, 1797-1804.  
962 **Weigel D.** 2012. Natural Variation in Arabidopsis: From Molecular Genetics to  
963 Ecological Genomics. *Plant Physiology* **158**, 2-22.  
964 **Xu L, Hu K, Zhang Z, Guan C, Chen S, Hua W, Li J, Wen J, Yi B, Shen J, Ma C,**  
965 **Tu J, Fu T.** 2016. Genome-wide association study reveals the genetic architecture of  
966 flowering time in rapeseed (*Brassica napus* L.). *DNA Research* **23**, 43-52.  
967 **Yamaguchi A, Kobayashi Y, Goto K, Abe M, Araki T.** 2005. TWIN SISTER OF FT  
968 (TSF) acts as a floral pathway integrator redundantly with FT. *Plant & Cell*  
969 *Physiology* **46**, 1175-1189.  
970 **Yi L, Chen C, Yin S, Li H, Li Z, Wang B, King GJ, Wang J, Liu K.** 2018. Sequence  
971 variation and functional analysis of a FRIGIDA orthologue (*BnaA3.FRI*) in *Brassica*  
972 *napus*. *BMC Plant Biology* **18**, 32.

973 **Zhang Z, Ersoz E, Lai C-Q, Todhunter RJ, Tiwari HK, Gore MA, Bradbury PJ, Yu**  
974 **J, Arnett DK, Ordovas JM, Buckler ES.** 2010. Mixed linear model approach  
975 adapted for genome-wide association studies. *Nat Genet* **42**, 355-360.  
976 **Zou X, Suppanz I, Raman H, Hou J, Wang J, Long Y, Jung C, Meng J.** 2012.  
977 Comparative analysis of *FLC* homologues in Brassicaceae provides insight into their  
978 role in the evolution of oilseed rape. *PLoS ONE* **7**, e45751.

979

980

981

**Table 1. Genome-wide highly significant SNP associated with variation in flowering time and photoperiodic response in diverse accessions of *E. nigra*. Photoperiod response was evaluated under long (LD) and short day (SD) conditions in the controlled environment cabinet (CE). QTL marked with \* were detected in the SAgS (Skipston/Ag Spectrum/Skipston) DH population (Raman et al 2015, 2016).**

| Growth Condition   | Experiment site | SNP              | Chromosome | Physical Position on <i>E. nigra</i> cv. Darmer assembly | P. value for genetic association | R <sup>2</sup> (%) | Physical Distance from candidate gene (Mb) | Putative Candidate gene   | Other flowering time QTL found within 200 kb regions        |
|--------------------|-----------------|------------------|------------|----------------------------------------------------------|----------------------------------|--------------------|--------------------------------------------|---------------------------|-------------------------------------------------------------|
| LD (CE)            | Wagga Wagga     | Bc-A02-g1232964  | A02        | 147990                                                   | 5.32E-07                         | 4.001696           | 0.014132                                   | <i>EPSTREAM OF FLC</i>    | Wagga (Field)                                               |
| SD (CE)            | Wagga Wagga     | Bc-A02-g1232964  | A02        | 147990                                                   | 1.13E-06                         | 6.162398           | 0.014132                                   | <i>EPSTREAM OF FLC</i>    | Wagga (Field)                                               |
| Field (plots)      | Condobolin      | Bc-A02-g1232964  | A02        | 147990                                                   | 1.25E-06                         | 6.578129           | 0.014132                                   | <i>EPSTREAM OF FLC</i>    | Wagga (Field)                                               |
| LD (CE)            | Wagga Wagga     | Bc-A02-g10020291 | A02        | 6838767                                                  | 4.01E-07                         | 4.096034           | 0.482858                                   | <i>FT (BnaA02g127302)</i> | *DTT-RV (GH), Biomax 2015 (SAGS DH), QBE(F) www-AcS-SAGS DH |
| LD (CE)            | Wagga Wagga     | Bc-A02-g1096183  | A02        | 6922499                                                  | 1.47E-06                         | 3.683964           | 0.34659                                    | <i>FT (BnaA02g127302)</i> | *DTT-RV (GH), Biomax 2015 (SAGS DH), QBE(F) www-AcS-SAGS DH |
| LD (CE)            | Wagga Wagga     | Bc-A02-g1017079  | A02        | 7019192                                                  | 2.48E-09                         | 3.754962           | 0.643227                                   | <i>FT (BnaA02g127302)</i> | *DTT-RV (GH), Biomax 2015 (SAGS DH), QBE(F) www-AcS-SAGS DH |
| LD (CE)            | Wagga Wagga     | Bc-A02-g10483644 | A02        | 7344109                                                  | 7.38E-07                         | 3.901669           | 0.525739                                   | <i>K4P2</i>               | LD(CE)                                                      |
| LD (CE)            | Wagga Wagga     | Bc-A02-g10493683 | A02        | 7351405                                                  | 2.34E-06                         | 3.535663           | 0.519263                                   | <i>K4P2</i>               | LD(CE)                                                      |
| Field (single row) | Wagga Wagga     | Bc-A03-p471570   | A03        | 378818                                                   | 3.21E-06                         | 6.217928           | 0.140957                                   | <i>TFL1</i>               | Field (single row), Field plots                             |

982

983

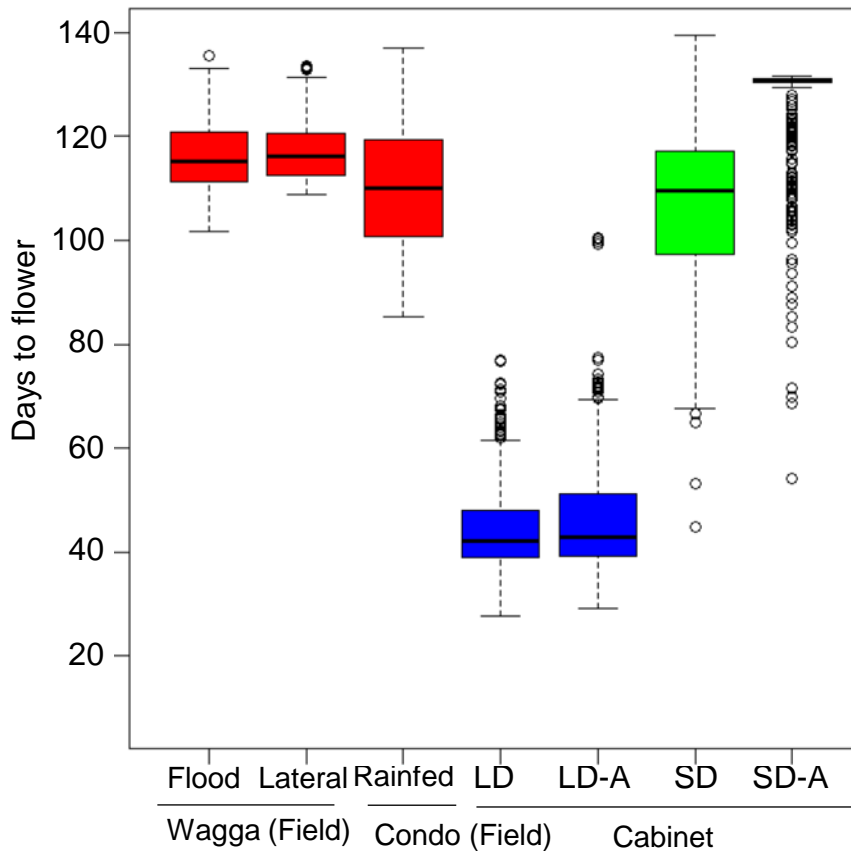

**Fig. 1.** Natural variation for flowering time. Box-plots showing genetic variation for flowering time in a diverse panel of canola accessions grown across five experiments under field, and controlled environment cabinets (cabinets). Days to flowering were scored in 2016 (Field plots at Wagga Wagga (flood irrigated) and Condobolin (Condo); Single rows at Wagga site under lateral move irrigation); Days to flowering were scored in long day condition (LD, 16 h) and short day condition (SD) plants under cabinets. Black dots indicate genotypes that did not flower till the end of experiment and were marked as ‘assigned’ (LD-A and SD-A). A total of 368 accessions were evaluated for flowering time under LD and SD conditions, while 300 accessions were evaluated under field conditions. Details are given in Supplementary Table 1.

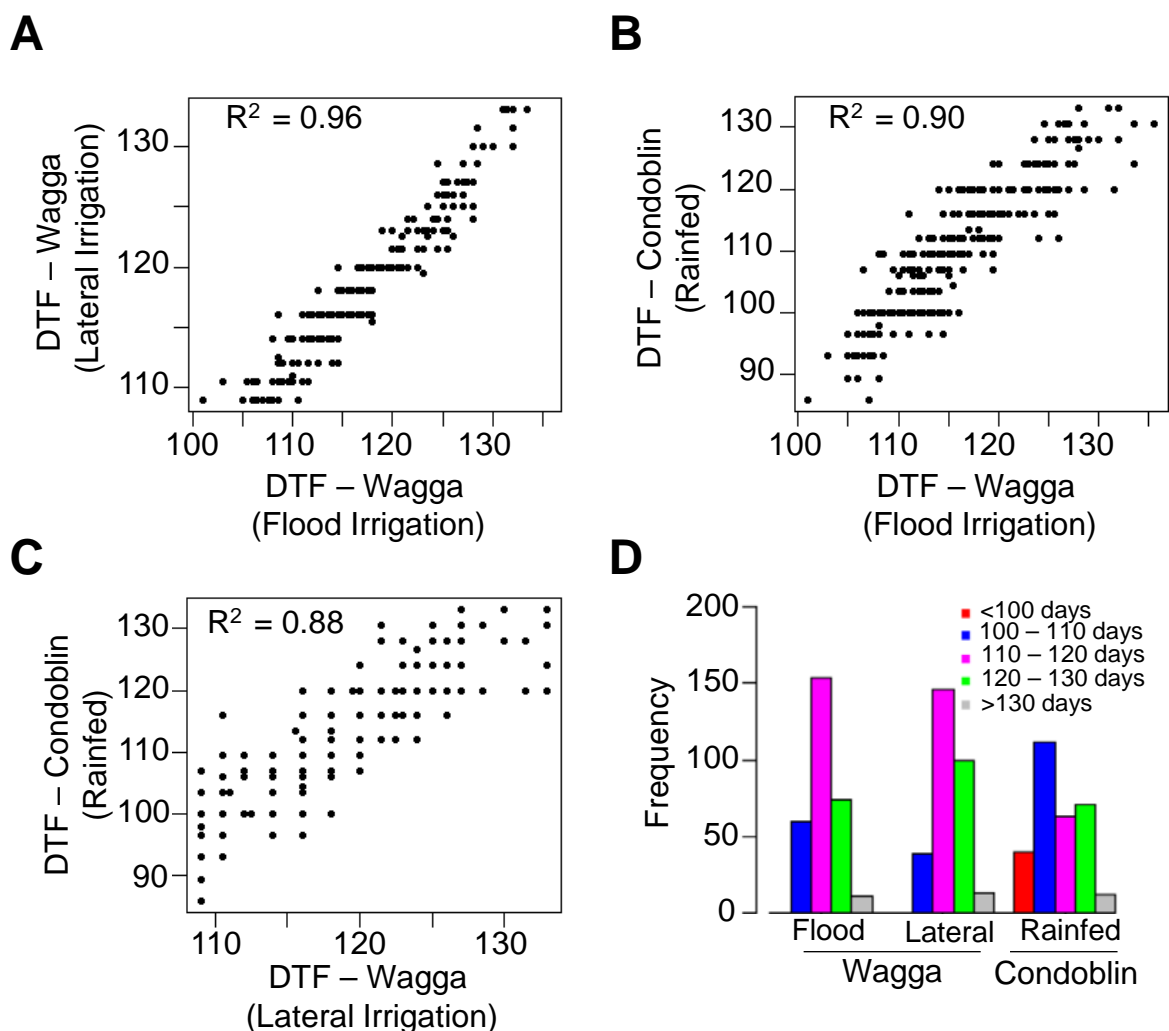

**Fig. 2 Pearson correlation for flowering time among 300 accessions of canola evaluated in field plots across different environments.** Flowering time (days to flower, DTF) was assessed thrice in a week. A) Flowering time correlation between field trials that were irrigated with lateral move or via flooding. B) Flowering time correlation between field trials at flood irrigated plots at Wagga with rainfed plots at Condobolin. C) Flowering time correlation between laterally irrigated plots at Wagga and rainfed plots at Condobolin and D) Frequency distribution of canola accessions based on the days to first flower under the varied conditions.



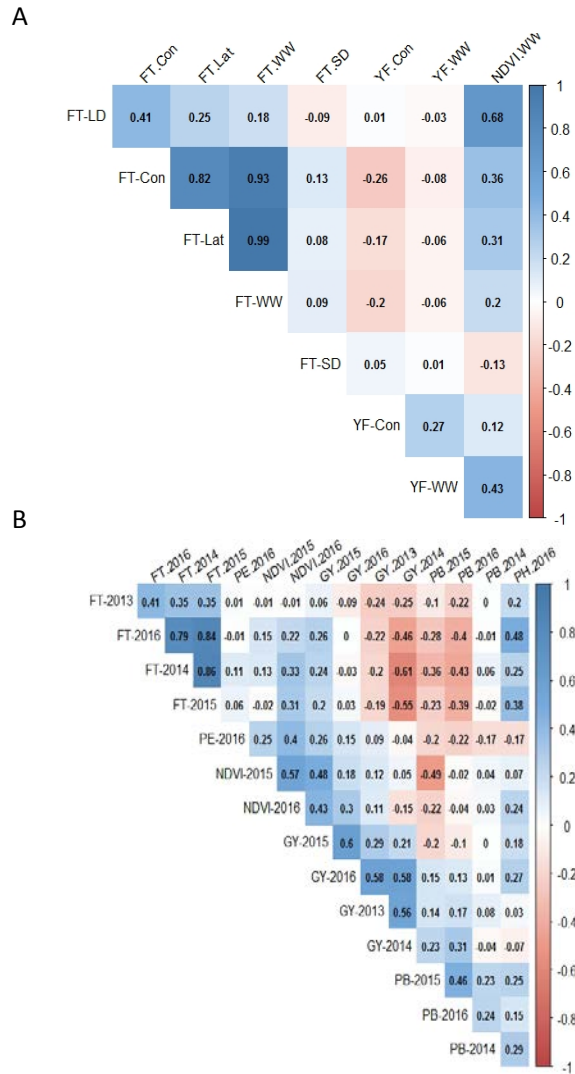

**Fig. 3. Pearson correlation between flowering time (FT) and yield related traits in a GWAS panel (A) and DH population derived from Skipton/Ag-Spectrum/Skipton (B).** FT-LD: flowering time (days to flower under LD conditions); FT-SD: flowering time (days to flower under SD conditions); FT-Con: flowering time at Condobolin; FT-Lat: flowering time at Wagga (lateral move); FT-WW: flowering time at Wagga (rainfed); YF-Con: Grain yield at Condobolin ; YF-WW: Grain yield at Wagga (rainfed), NDVI.WW: Normalised Difference Vegetative Index at Wagga; PE: plant emergence; GY: grain yield; PB: plant biomass (g/plant) and PH: plant height (cm).

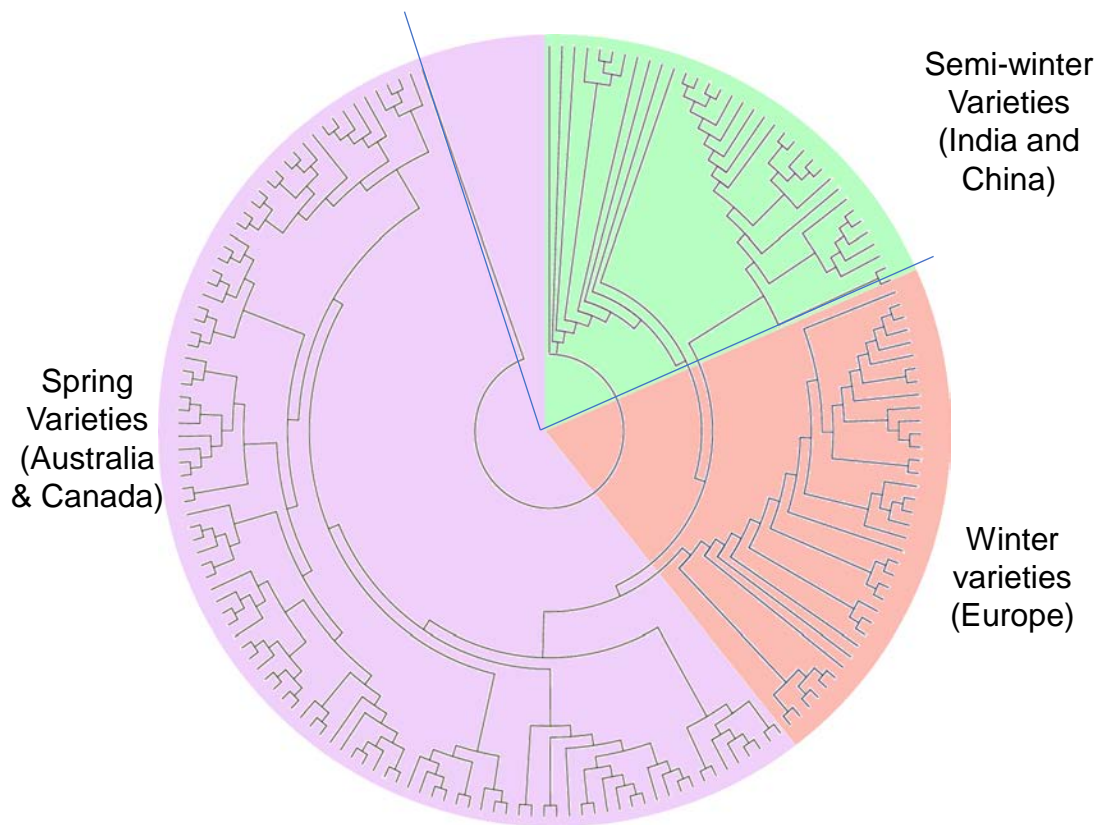

**Fig 4: Molecular diversity in a GWAS panel of 368 *Brassica napus* accessions.** (A). Three dominant clusters shown in different shades; violet, red and light green colours represent predominantly Australian, European, and Indo-Chinese origins cultivars, respectively. Details are given in supplementary Table x. Tree was drawn with MEGA 6.

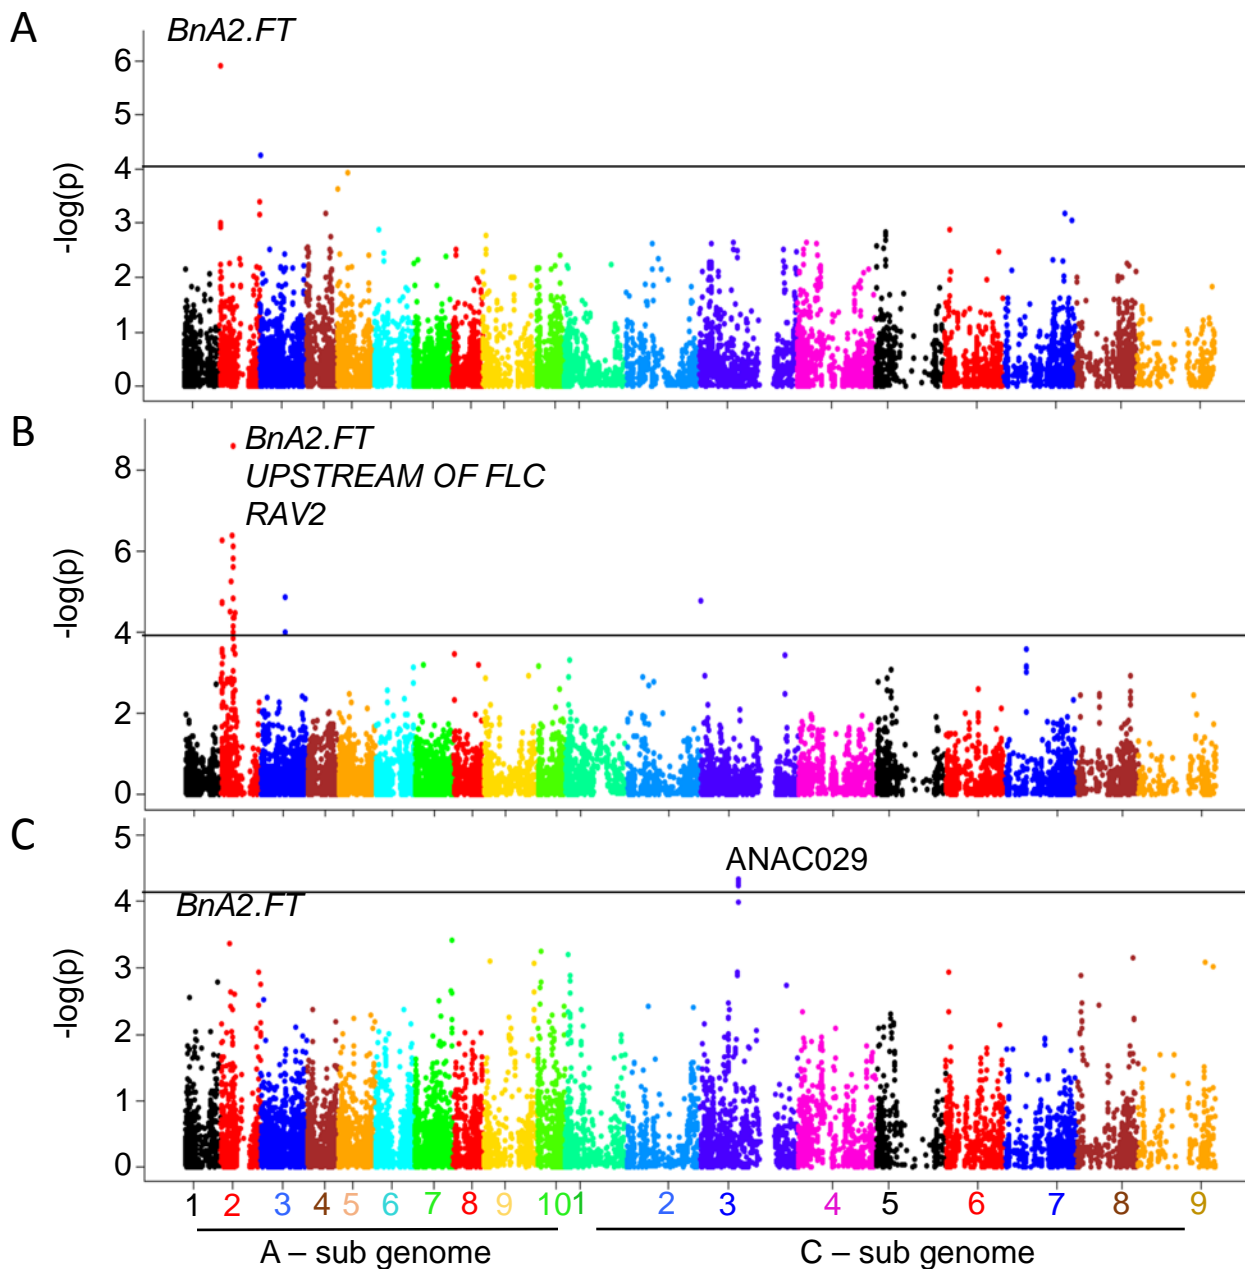

**Fig. 5.** Manhattan plots for the detected associations for flowering time. Plots show genome-wide  $P$  values for associations between SNP markers and flowering time: (A) Field condition at Condobolin, Australia, (B) long -day conditions in controlled environment cabinet and (C) response to photoperiod. Different colours represent different chromosomes of *B. napus* (A1-A10, C1-C9). Significant associations -  $\log_{10}(p)$  value of  $\leq 4$  are shown with a solid horizontal line (in black colour).

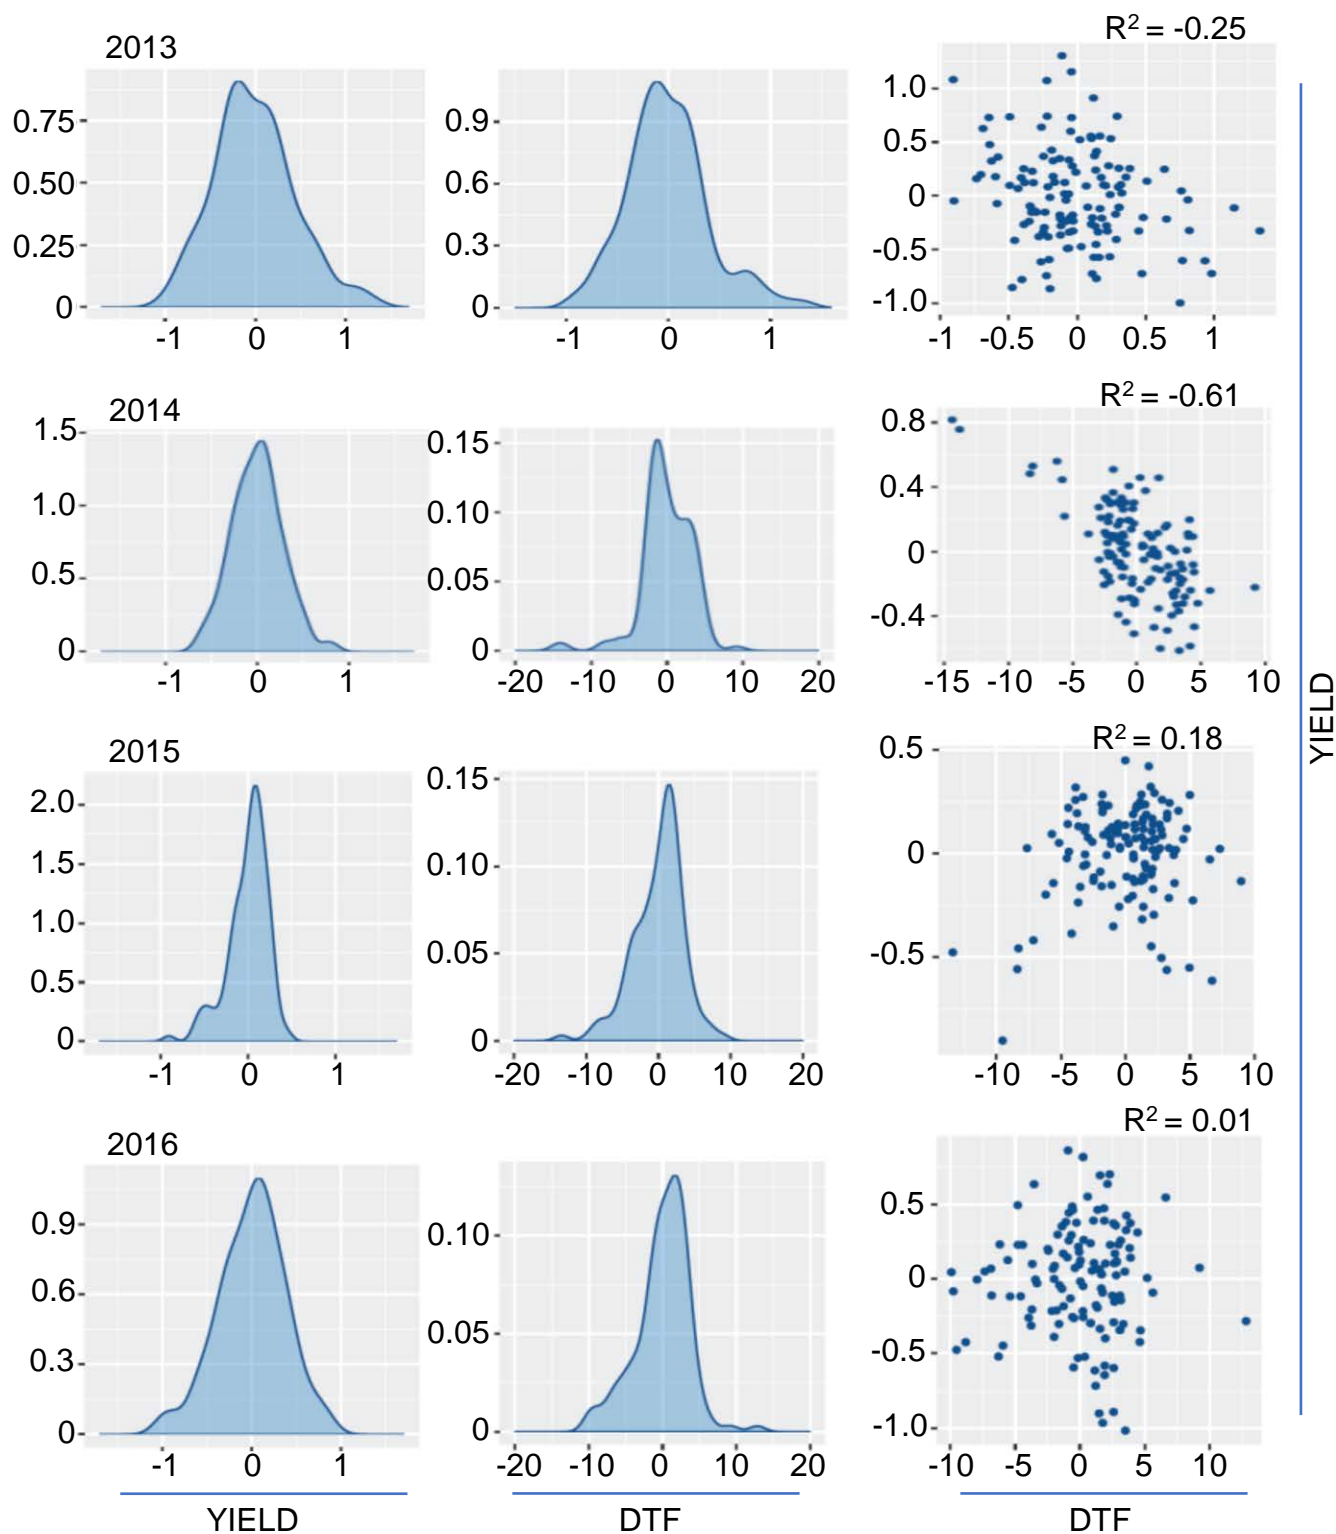

**Fig. 6. Distribution of flowering time variation in the biparental mapping population.** Pair-plots showing genetic correlation of EBLUPS (empirical best linear unbiased estimators) from the univariate analysis of flowering time and grain yield among 144 doubled haploid lines of *B. napus* population derived from Skipton/Ag-Spectrum//Skipton. DH lines were grown across 4 phenotypic environments (2013-2016) in field plots, 2013 at Euberta, NSW, Australia; 2014 at Wagga Wagga, NSW, Australia (Raman et al 2016), 2015 and 2016 at the Wagga Wagga (this study).

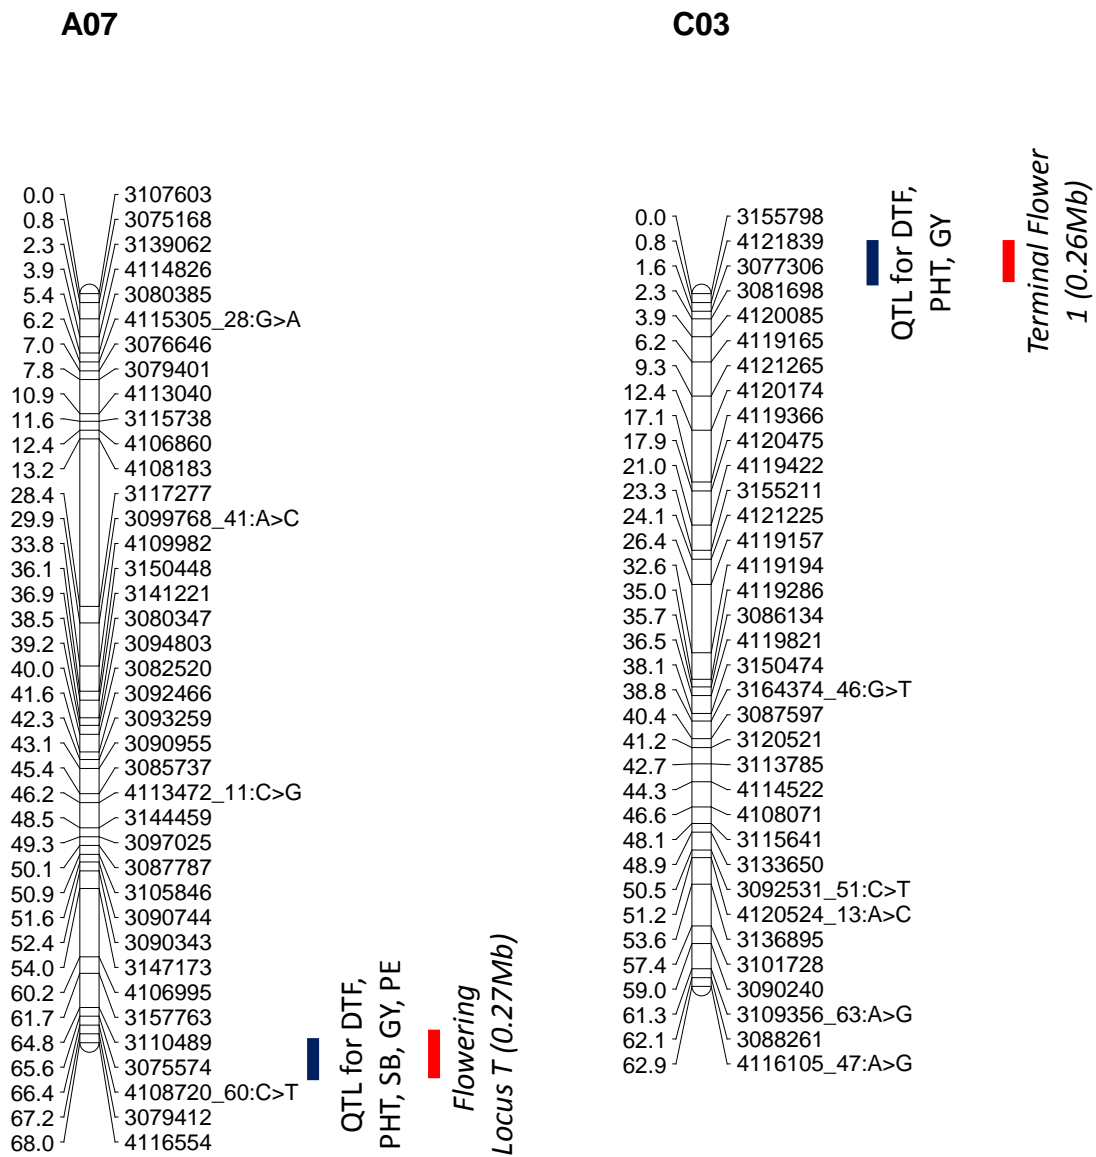

**Fig. 7. Graphical representation showing localisation of multi-trait QTL associated with plant emergence (PE); above ground shoot biomass (SB); flowering time (days to flower, DTF); plant height (PHT) and grain yield (GY) in a doubled haploid population from Skipton/Ag-Spectrum//Skipton. DArTseq markers and their genetic map positions are shown on right- and left-hand side, respectively. Solid lines (in blue and red colour) represent to markers that showed significant associations with traits of interest. Map distances are given in cM and displayed using the MapChart.**

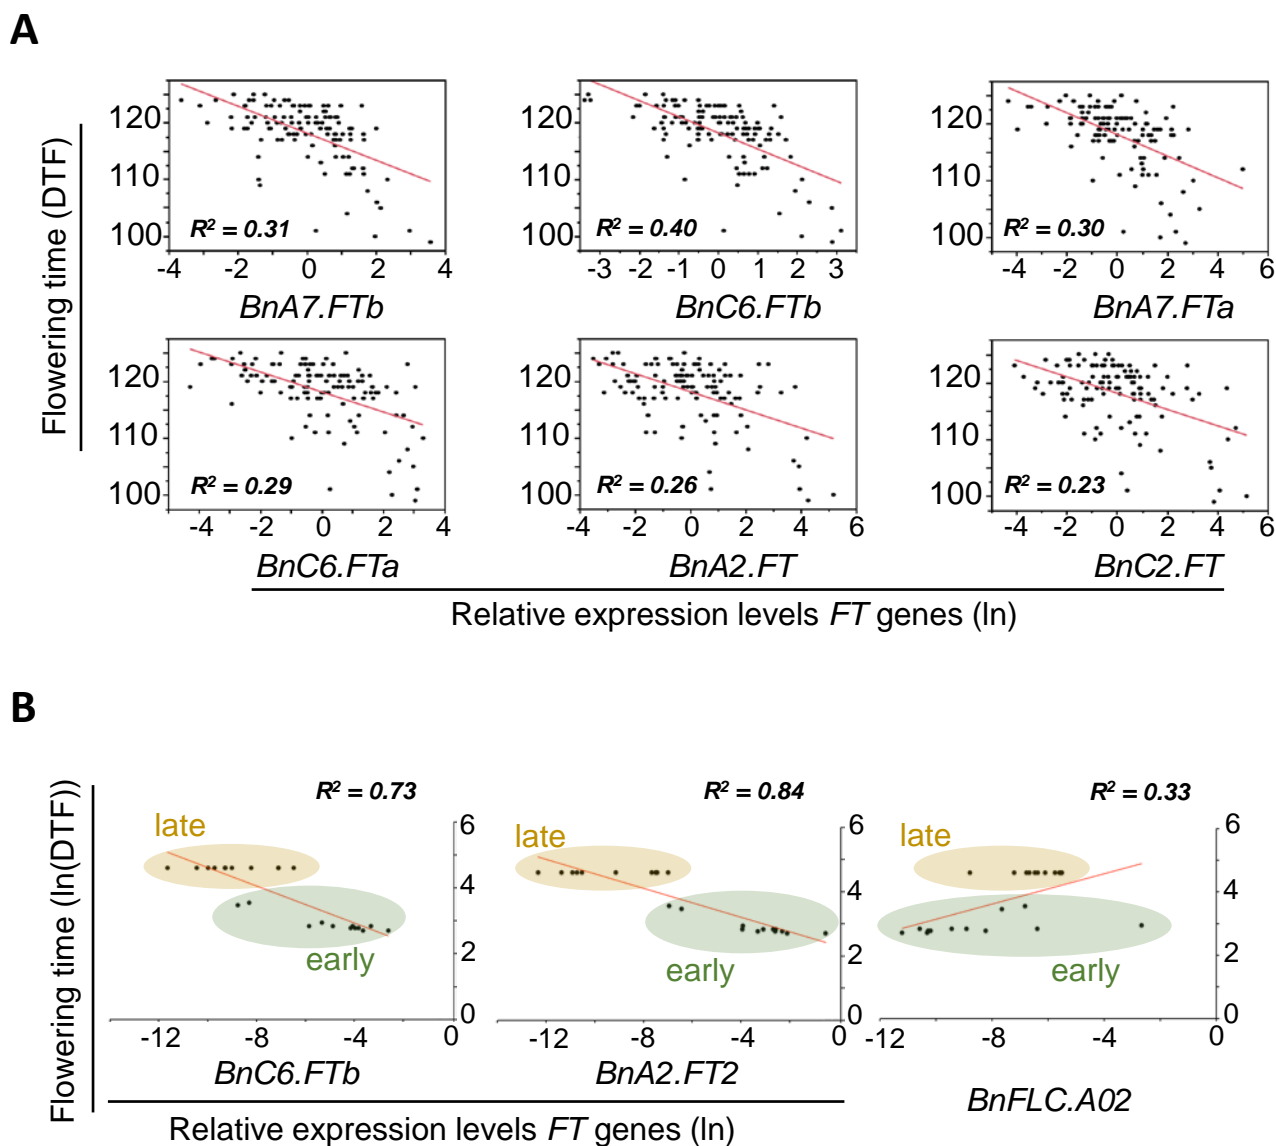

**Fig. 8. *FT* is a major determinant of flowering time variation and photoperiod gene in canola varieties.** A), Expression analysis of different *FT* paralogs (*BnA2.FTa*, *BnC2.FT*, *BnA7.FTa*, *BnA7.FTb*, *BnC6.FTa*, *BnC6.FTb*) on leaves taken from field grown plants of 144 doubled haploid lines of Skipton/Ag-Spectrum/Skipton, and its correlation with flowering time. B), Expression analyses of *FT* genes; *BnC6.FTb* (chromosome C6) and *BnA2.FT* (chromosome A02) and *BnFLC2* on leaves taken from LD grown plants of 24 diverse accessions, representing flowering time diversity in a GWAS panel. The relative expression levels of *FT*/and *FLC* after normalisation with the reference *UBC9*, is plotted against flowering time.

A

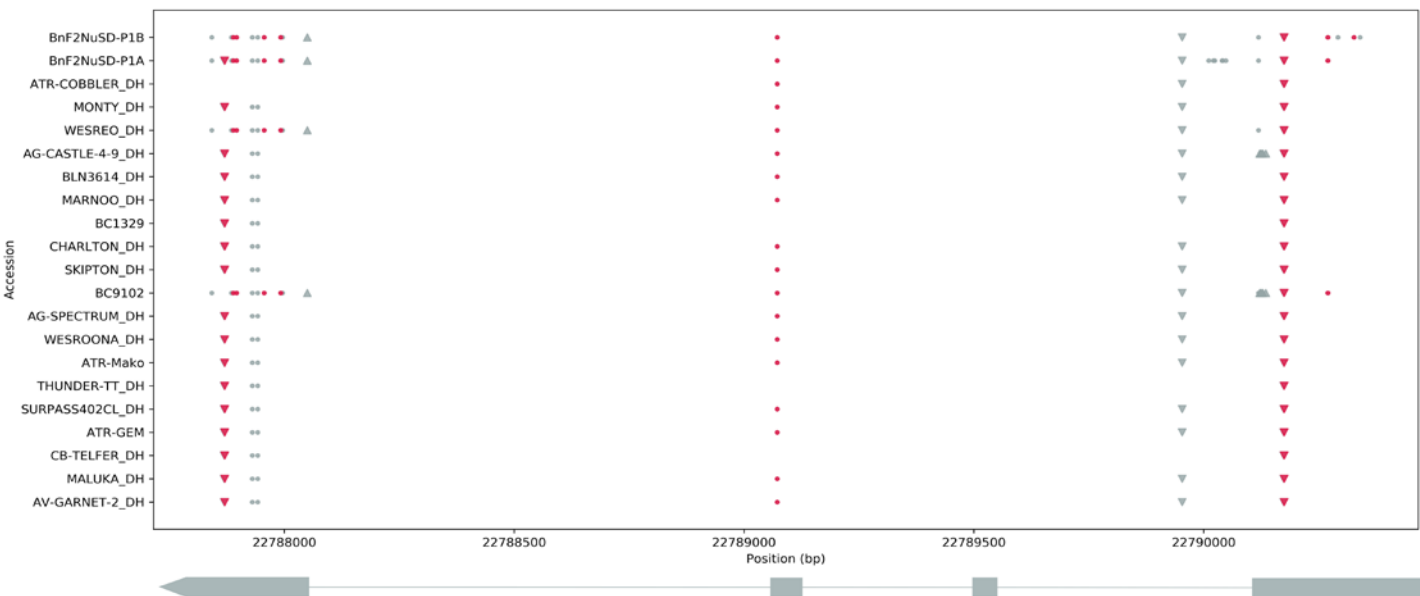

B

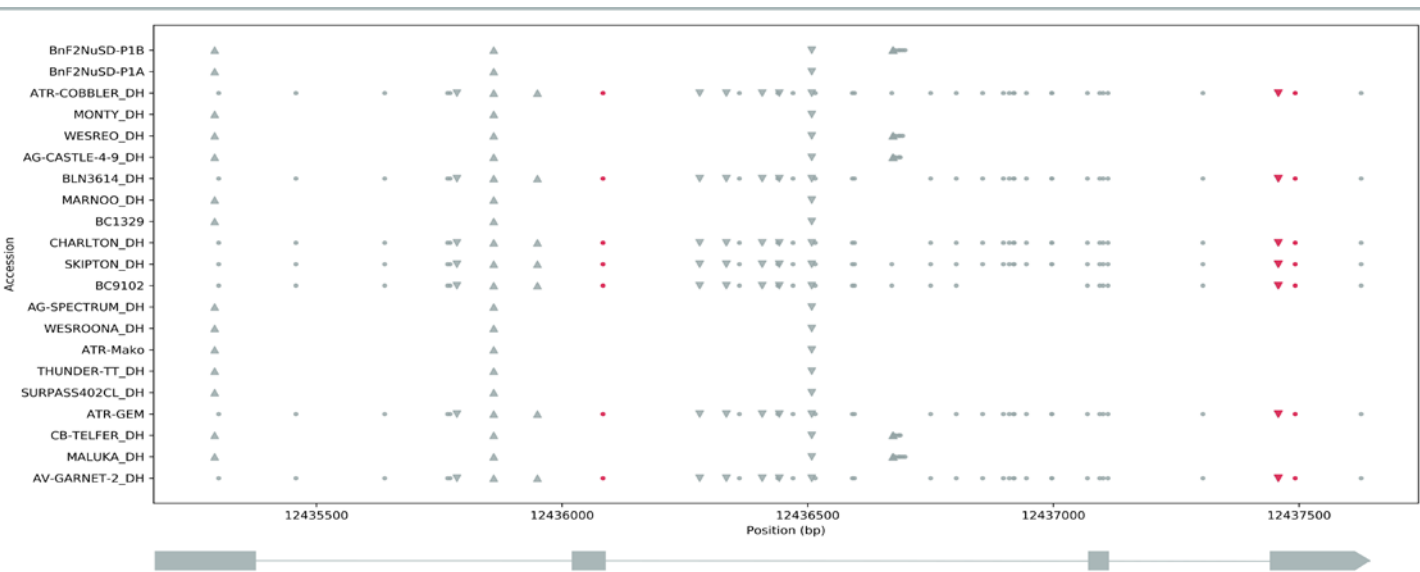

**Fig. 9. Location of SNPs and indels in FT paralogs *BnaA07g33120D* (A) and *BnaC04g14850D* (B) across the 21 lines representing the GWAS panel and parents. Dots represent SNPs, triangles insertions, and inverted triangles deletions. SNPs and indels shaded in red are non-synonymous. The x-axis shows the scaffold genomic coordinates based on genome version 4.1. The four exon gene model is shown below the plot, with the direction of transcription indicated by the arrow."**

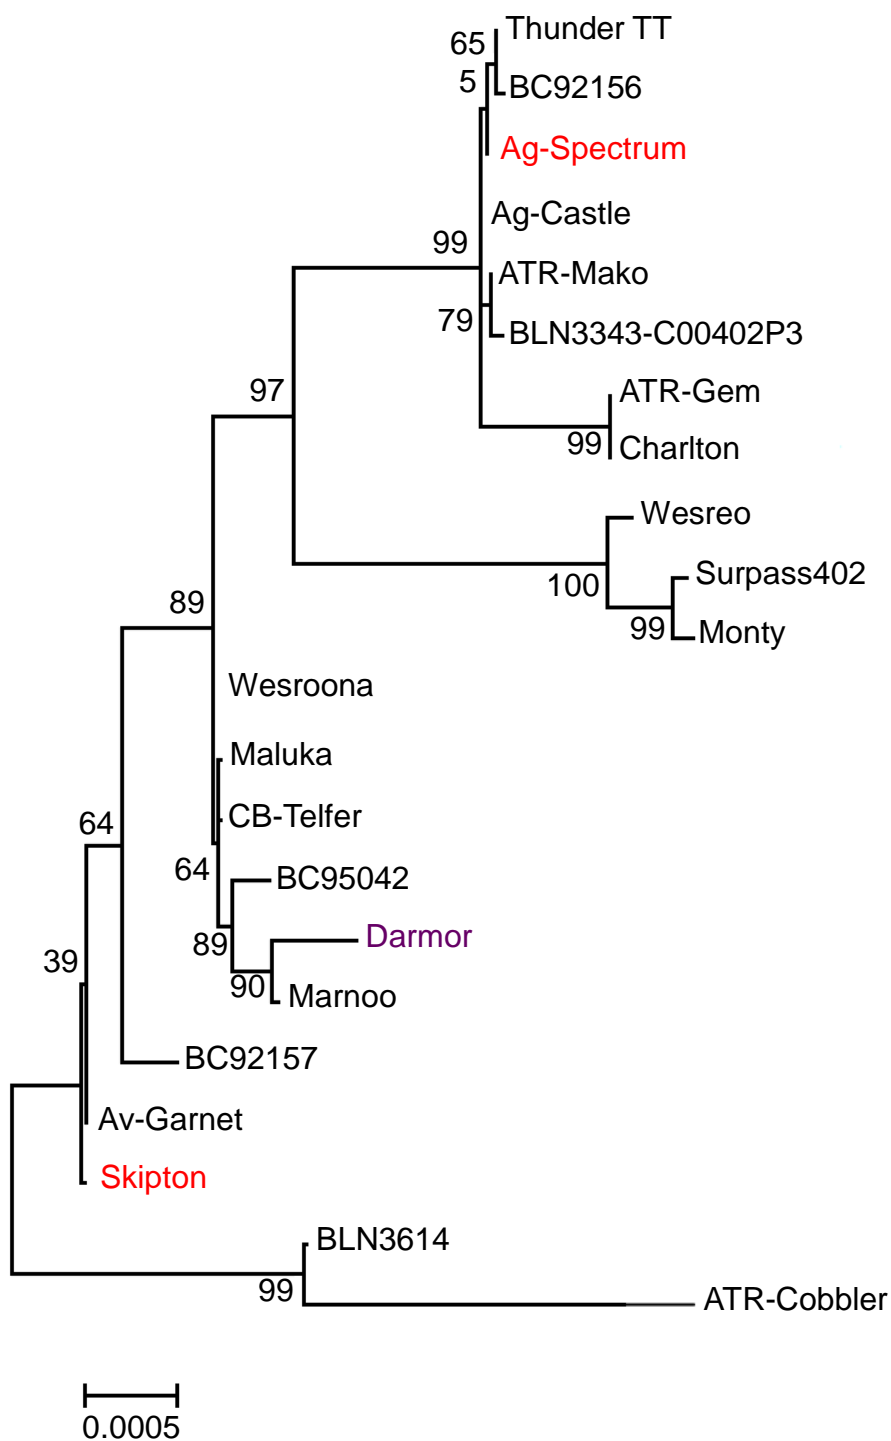

**Fig. 10. Neighbour-joining tree based on nucleotide variation across all *FT* paralogs among 21 accessions of *Brassica napus* representing GWAS and parental lines (shown in red colour) of a doubled haploid validation population derived from Skipton/Ag-Spectrum/Skipton. Tree was generated in MEGA 6. Nucleotide variation in *FT* genes was also compared with the corresponding *FT* genes in the reference ‘Darmor’ assembly (in purple colour, Supplementary Table x) . Number refers to percent bootstrap support for branches with greater than 50% support.**
